# Supplementary material for: Vinylation of a Secondary Amine Core with Calcium Carbide for Efficient Post-Modification and Access to Polymeric Materials
Source: MDPI journal article supplement (doi:10.3390/molecules23030648), 2018-03-13
Supplement: s1 [file s1]

## **Vinylation of a Secondary Amine Core with Calcium Carbide for Efficient Post-Modification and Access to Polymeric Materials**

Konstantin S. Rodygin,<sup>a</sup> Alexander S. Bogachenkov,<sup>a</sup> Valentine P. Ananikov<sup>a,b \*</sup>

<sup>a</sup> *Saint Petersburg State University, Universitetskii prospect, 26, Petergof, Russia.*

<sup>b</sup> *N.D. Zelinsky Institute of Organic Chemistry, Russian Academy of Sciences, Leninsky Prospect, 47, Moscow, Russia; . e-mail: val@ioc.ac.ru*

### **Content**

|                                          |    |
|------------------------------------------|----|
| Characterization and spectral data ..... | 2  |
| NMR spectra .....                        | 6  |
| Crystal structures .....                 | 21 |

## Characterization and spectral data

### 9-Vinyl-9H-carbazole (2a)

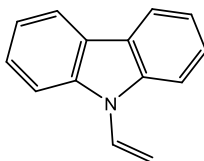

**Yield, %:** 88 (by NMR); 83 (isolated). **<sup>1</sup>H NMR** (400 MHz, DMSO-d<sub>6</sub>) δ 8.19 (d, *J* = 8.0 Hz, 2H), 7.85 (d, *J* = 8.0 Hz, 2H), 7.60 (dd, *J* = 16.0, 8.0 Hz, 1H), 7.50 (t, *J* = 8.0 Hz, 2H), 7.31 (t, *J* = 8.0 Hz, 2H), 5.61 (d, *J* = 16.0 Hz, 1H), 5.13 (d, *J* = 8.0 Hz, 1H); **<sup>13</sup>C NMR** (101 MHz, DMSO-d<sub>6</sub>) δ 138.7, 129.8, 126.5, 123.3, 120.7, 120.3, 110.9, 101.1; **HRMS** (*m/z*): [M+H]<sup>+</sup> calcd. for C<sub>14</sub>H<sub>11</sub>NH<sup>+</sup>, 194.0964; found, 194.0971.

### N,N-Diphenylvinylamine (2b)

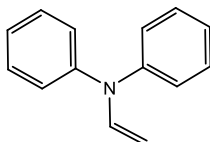

**Yield, %:** 80 (by NMR); 72 (isolated). **<sup>1</sup>H NMR** (400 MHz, acetone-d<sub>6</sub>) δ 7.38–7.33 (m, 4H), 7.13–7.09 (m, 2H), 7.05–6.97 (m, 5H), 4.10 (d, *J* = 8.0 Hz, 1H), 3.92 (d, *J* = 12.0 Hz, 1H); **<sup>13</sup>C NMR** (101 MHz, acetone-d<sub>6</sub>) δ 146.1, 138.9, 130.4, 124.5, 124.2, 90.5; **HRMS** (*m/z*): [M+H]<sup>+</sup> calcd. for C<sub>14</sub>H<sub>13</sub>NH<sup>+</sup>, 196.1121; found, 196.1118.

### N-(β-Naphthyl)-N-phenylvinylamine (2c)

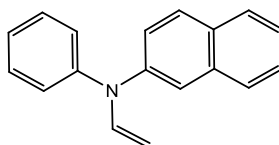

**Yield, %:** 82 (by NMR); 76 (isolated). **<sup>1</sup>H NMR** (400 MHz, DMSO-d<sub>6</sub>) δ 7.86–7.82 (m, 2H), 7.78 (d, *J* = 8.0 Hz, 1H), 7.49–7.35 (m, 5H), 7.16–7.05 (m, 5H), 4.18 (d, *J* = 8.0 Hz, 1H), 3.93 (d, *J* = 16.0 Hz, 1H); **<sup>13</sup>C NMR** (101 MHz, DMSO-d<sub>6</sub>) δ 144.4, 142.2, 138.1, 134.0, 129.9, 129.7, 129.2, 127.5, 127.1, 126.5, 124.8, 124.0, 123.6, 122.9, 119.0, 90.8; **HRMS** (*m/z*): [M+H]<sup>+</sup> calcd. for C<sub>18</sub>H<sub>15</sub>NH<sup>+</sup>, 246.1277; found, 246.1284.

### 1-Vinyl-1H-pyrrole (2d)

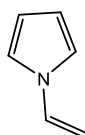

**Yield, %:** 79 (by NMR); 73 (isolated). **<sup>1</sup>H NMR** (400 MHz, DMSO-d<sub>6</sub>) δ 7.10 (t, *J* = 4.0 Hz, 2H), 7.02 (dd, *J* = 16.0, 8.0 Hz, 1H), 6.14 (t, *J* = 4.0 Hz, 1H), 5.23 (d, *J* = 16.0 Hz, 1H), 4.62 (d,

$J = 8.0$  Hz, 1H);  $^{13}\text{C}$  NMR (101 MHz, DMSO- $d_6$ )  $\delta$  133.2, 118.8, 109.8, 96.6; HRMS (m/z):  $[\text{M}+\text{H}]^+$  calcd. for  $\text{C}_6\text{H}_7\text{NH}^+$ , 94.0651; found, 94.0655.

### 3,5-Dimethyl-1-vinyl-1H-pyrazole (2e)

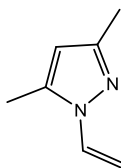

**Yield, %:** 72 (by NMR); 67 (isolated).  $^1\text{H}$  NMR (400 MHz, DMSO- $d_6$ )  $\delta$  7.07 (dd,  $J = 16.0, 8.0$  Hz, 1H), 5.93 (s, 1H), 5.43 (d,  $J = 16.0$  Hz, 1H), 4.70 (d,  $J = 8.0$  Hz, 1H), 2.25 (s, 3H), 2.13 (s, 3H);  $^{13}\text{C}$  NMR (101 MHz, DMSO- $d_6$ )  $\delta$  148.6, 139.2, 129.9, 106.5, 98.5, 13.4, 10.3; HRMS (m/z):  $[\text{M}+\text{H}]^+$  calcd. for  $\text{C}_7\text{H}_{10}\text{N}_2\text{H}^+$ , 123.0917; found, 123.0919.

### 1-Vinyl-1H-indole (2f)

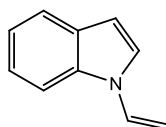

**Yield, %:** 89 (by NMR); 79 (isolated).  $^1\text{H}$  NMR (400 MHz, DMSO- $d_6$ )  $\delta$  7.82 (s, 1H), 7.69 (d,  $J = 8.0$  Hz, 1H), 7.59 (d,  $J = 8.0$  Hz, 1H), 7.50 (dd,  $J = 16.0, 8.0$  Hz, 1H), 7.22 (t,  $J = 8.0$  Hz, 1H), 7.11 (t,  $J = 8.0$  Hz, 1H), 6.66 (s, 1H), 5.39 (d,  $J = 12.0$  Hz, 1H), 4.76 (d,  $J = 8.0$  Hz, 1H);  $^{13}\text{C}$  NMR (101 MHz, DMSO- $d_6$ )  $\delta$  135.1, 129.9, 128.6, 124.0, 122.4, 120.7, 120.5, 110.0, 104.7, 96.4; HRMS (m/z):  $[\text{M}+\text{H}]^+$  calcd. for  $\text{C}_{10}\text{H}_9\text{NH}^+$ , 144.0808; found, 144.0812.

### 2-Methyl-1-vinyl-1H-indole (2g)

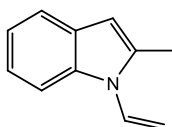

**Yield, %:** 78 (by NMR); 67 (isolated).  $^1\text{H}$  NMR (400 MHz, DMSO- $d_6$ )  $\delta$  7.64 (d,  $J = 8.0$  Hz, 1H), 7.47 (d,  $J = 8.0$  Hz, 1H), 7.21 (dd,  $J = 16.0, 8.0$  Hz, 1H), 7.15–7.12 (m, 1H), 7.08–7.05 (m, 1H), 6.34 (s, 1H), 5.41 (d,  $J = 16.0$  Hz, 1H), 5.05 (d,  $J = 8.0$  Hz, 1H), 2.45 (s, 3H);  $^{13}\text{C}$  NMR (101 MHz, DMSO- $d_6$ )  $\delta$  136.4, 135.5, 130.3, 128.5, 121.5, 120.4, 119.5, 110.9, 102.6, 13.4; HRMS (m/z):  $[\text{M}+\text{H}]^+$  calcd. for  $\text{C}_{11}\text{H}_{11}\text{NH}^+$ , 158.0964; found, 158.0970.

### 2,3-Dimethyl-1-vinyl-1H-indole (2h)

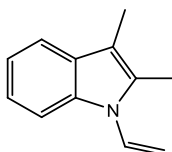

**Yield, %:** 86 (by NMR); 74 (isolated).  $^1\text{H}$  NMR (400 MHz, DMSO- $d_6$ )  $\delta$  7.62 (d,  $J = 8.0$  Hz, 1H), 7.45 (d,  $J = 8.0$  Hz, 1H), 7.20 (dd,  $J = 16.0, 8.0$  Hz, 1H), 7.16–7.12 (m, 1H), 7.10–7.06 (m, 1H), 5.34 (d,  $J = 16.0$  Hz, 1H), 4.97 (d,  $J = 8.0$  Hz, 1H), 2.37 (s, 3H), 2.18 (s, 3H);  $^{13}\text{C}$  NMR

(101 MHz, DMSO- $d_6$ )  $\delta$  134.6, 132.0, 130.5, 129.4, 121.6, 120.0, 117.9, 110.7, 108.4, 101.3, 10.8, 8.4; **HRMS** ( $m/z$ ):  $[M+H]^+$  calcd. for  $C_{12}H_{13}NH^+$ , 172.1121; found, 172.1126.

**7-Ethyl-1-vinyl-1H-indole (2i)**

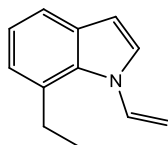

**Yield, %:** 85 (by NMR); 77 (isolated).  **$^1H$  NMR** (400 MHz, acetone- $d_6$ )  $\delta$  7.67 (dd,  $J$  = 12.0, 8.0 Hz, 1H), 7.56 (d,  $J$  = 4.0 Hz, 1H), 7.44–7.40 (m, 1H), 7.02–7.00 (m, 2H), 6.61 (d,  $J$  = 4.0 Hz, 1H), 5.27 (d,  $J$  = 16.0 Hz, 1H), 4.82 (d,  $J$  = 8.0 Hz, 1H), 3.07 (q,  $J$  = 8.0 Hz, 2H), 1.32 (t,  $J$  = 8.0 Hz, 3H);  **$^{13}C$  NMR** (101 MHz, acetone- $d_6$ )  $\delta$  134.5, 134.2, 131.4, 128.7, 126.1, 124.9, 121.5, 120.0, 105.8, 99.8, 27.0, 16.1.

**2-Phenyl-1-vinyl-1H-indole (2j)**

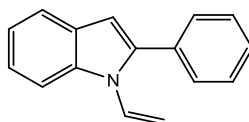

**Yield, %:** 37 (by NMR); 16 (isolated).  **$^1H$  NMR** (400 MHz, DMSO- $d_6$ )  $\delta$  7.76 (d,  $J$  = 8.0 Hz, 1H), 7.62 (d,  $J$  = 8.0 Hz, 1H), 7.57–7.55 (m, 2H), 7.53–7.49 (m, 2H), 7.46–7.42 (m, 1H), 7.27–7.23 (m, 1H), 7.18–7.14 (m, 1H), 7.07 (dd,  $J$  = 16.0, 8.0 Hz, 1H), 6.72 (s, 1H), 5.28 (d,  $J$  = 16.0 Hz, 1H), 5.13 (d,  $J$  = 8.0 Hz, 1H);  **$^{13}C$  NMR** (101 MHz, DMSO- $d_6$ )  $\delta$  139.8, 136.4, 131.9, 131.1, 129.1, 128.6, 128.4, 128.2, 122.7, 121.0, 120.5, 111.5, 105.4, 104.4; **HRMS** ( $m/z$ ):  $[M+H]^+$  calcd. for  $C_{16}H_{13}NH^+$ , 220.1121; found, 220.1120.

**6-Chloro-1-vinyl-1H-indole (2k)**

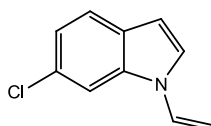

**Yield, %:** 55 (by NMR); 39 (isolated).  **$^1H$  NMR** (400 MHz, DMSO- $d_6$ )  $\delta$  7.88–7.87 (m, 2H), (d,  $J$  = 4.0 Hz, 2H), 7.59 (d,  $J$  = 12.0 Hz, 1H), 7.54 (dd,  $J$  = 16.0, 12.0 Hz, 1H), 7.12 (dd,  $J$  = 12.0, 4.0 Hz, 1H), 6.69 (d,  $J$  = 4.0 Hz, 1H), 5.42 (d,  $J$  = 16.0 Hz, 1H), 4.79 (d,  $J$  = 8.0 Hz, 1H);  **$^{13}C$  NMR** (101 MHz, DMSO- $d_6$ )  $\delta$  135.5, 129.7, 127.4, 127.2, 124.9, 122.0, 120.8, 110.1, 104.8, 97.4; **HRMS** ( $m/z$ ):  $[M+H]^+$  calcd. for  $C_{10}H_8NClH^+$ , 178.0418; found, 178.0409.

**9-Vinyl-2,3,4,9-tetrahydro-1H-carbazole (2l)**

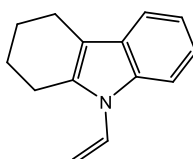

**Yield, %:** 84 (by NMR); 79 (isolated). **<sup>1</sup>H NMR** (400 MHz, DMSO-d<sub>6</sub>) δ 7.63 (d, *J* = 8.0 Hz, 1H), 7.41 (d, *J* = 8.0 Hz, 1H), 7.23–7.08 (m, 3H), 5.26 (d, *J* = 16.0 Hz, 1H), 4.87 (d, *J* = 8.0 Hz, 1H), 2.77–2.62 (m, 4H), 1.84–1.78 (m, 4H); **<sup>13</sup>C NMR** (101 MHz, DMSO-d<sub>6</sub>) δ 135.0, 134.8, 129.9, 128.0, 121.7, 120.1, 117.6, 111.6, 110.7, 99.6, 22.8, 22.2, 20.5; **HRMS** (*m/z*): [M+H]<sup>+</sup> calcd. for C<sub>14</sub>H<sub>15</sub>NH<sup>+</sup>, 198.1277; found, 198.1277

**9,9'-Divinyl-9*H*,9'*H*-3,3'-bicarbazole (2m)**

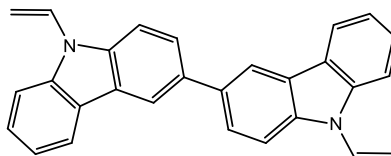

**Yield, %:** 32 (isolated). **<sup>1</sup>H NMR** (400 MHz, DMSO-d<sub>6</sub>) δ 8.67 (s, 2H), 8.35 (d, *J* = 8.0 Hz, 2H), 7.96 (br s, 4H), 7.88 (d, *J* = 8.0 Hz, 2H), 7.65 (dd, *J* = 16.0, 8.0 Hz, 2H), 7.53 (t, *J* = 8.0, 8.0 Hz, 2H), 7.35 (t, *J* = 8.0, 8.0 Hz, 2H), 5.65 (d, *J* = 16.0 Hz, 2H), 5.16 (d, *J* = 8.0 Hz, 2H); **<sup>13</sup>C NMR** (101 MHz, DMSO-d<sub>6</sub>): δ 139.2, 137.9, 133.6, 129.9, 126.7, 125.6, 124.1, 123.5, 120.9, 120.7, 118.4, 111.4, 111.0, 101.0; **HRMS** (*m/z*): [M+H]<sup>+</sup> calcd. for C<sub>28</sub>H<sub>20</sub>N<sub>2</sub>H<sup>+</sup>, 385.1699; found, 385.1689

**2-Methyl-4-(4-methylpiperazin-1-yl)-10-vinyl-10*H*-benzo[*b*]thieno[2,3-*e*][1,4]diazepine (2n)**

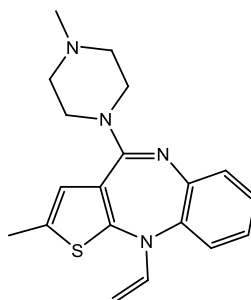

**Yield, %:** 44 (isolated). **<sup>1</sup>H NMR** (400 MHz, DMSO-d<sub>6</sub>) δ 7.11–7.07 (m, 1H), 7.04–7.02 (m, 1H), 6.98 (t, *J* = 8.0 Hz, 2H), 6.65 (dd, *J* = 16.0, 8.0 Hz, 1H), 6.56 (s, 1H), 4.51 (d, *J* = 16.0 Hz, 1H), 4.11 (d, *J* = 8.0 Hz, 1H), 3.46 (m, 4H), 2.45–2.42 (m, 2H), 2.39 (s, 3H), 2.33–2.30 (m, 2H), 2.21 (s, 3H); **<sup>13</sup>C NMR** (101 MHz, DMSO-d<sub>6</sub>): δ 155.3, 146.0, 143.6, 140.2, 138.9, 136.3, 127.1, 126.3, 124.6, 123.7, 123.2, 121.5, 87.4, 54.4, 46.0, 45.7, 15.6; **HRMS** (*m/z*): [M+H]<sup>+</sup> calcd. for C<sub>19</sub>H<sub>22</sub>N<sub>4</sub>SH<sup>+</sup>, 339.1638; found, 339.1640

## NMR spectra

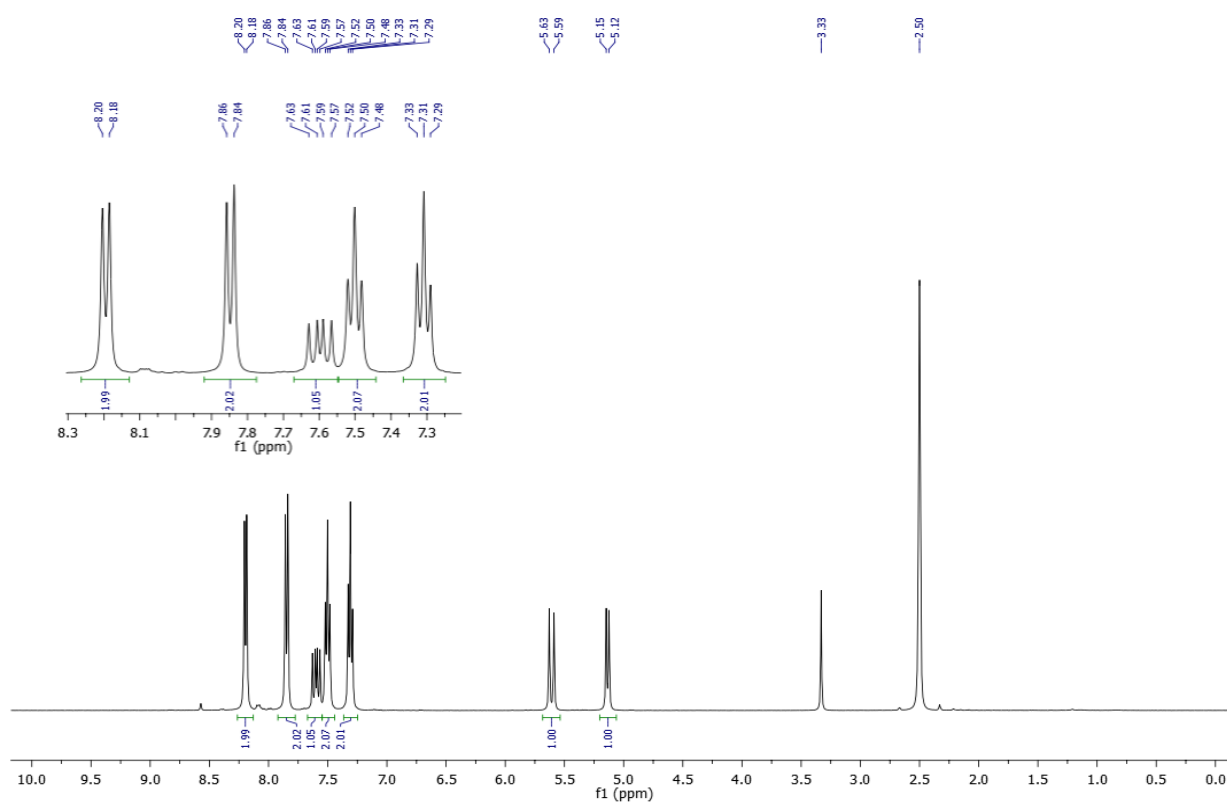

**Figure S1.** <sup>1</sup>H NMR spectrum of 9-vinyl-9H-carbazole (**2a**)

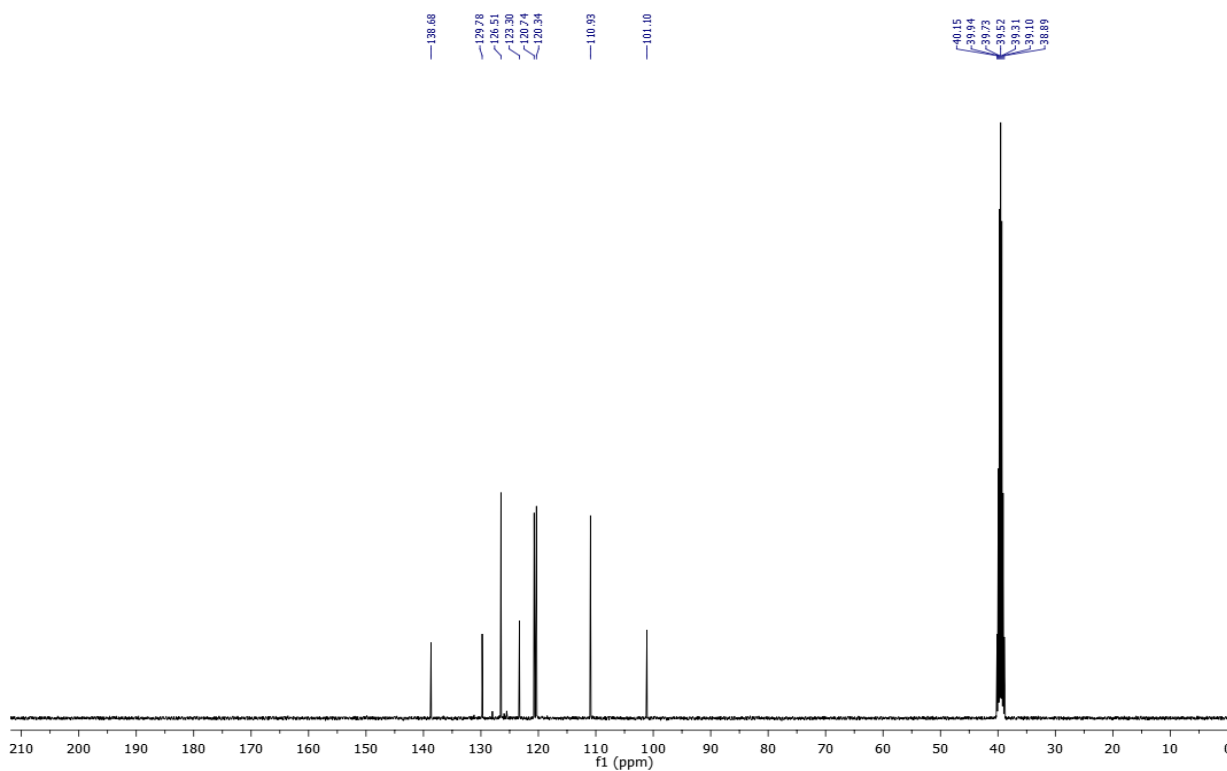

**Figure S2.** <sup>13</sup>C NMR spectrum of 9-vinyl-9H-carbazole (**2a**)

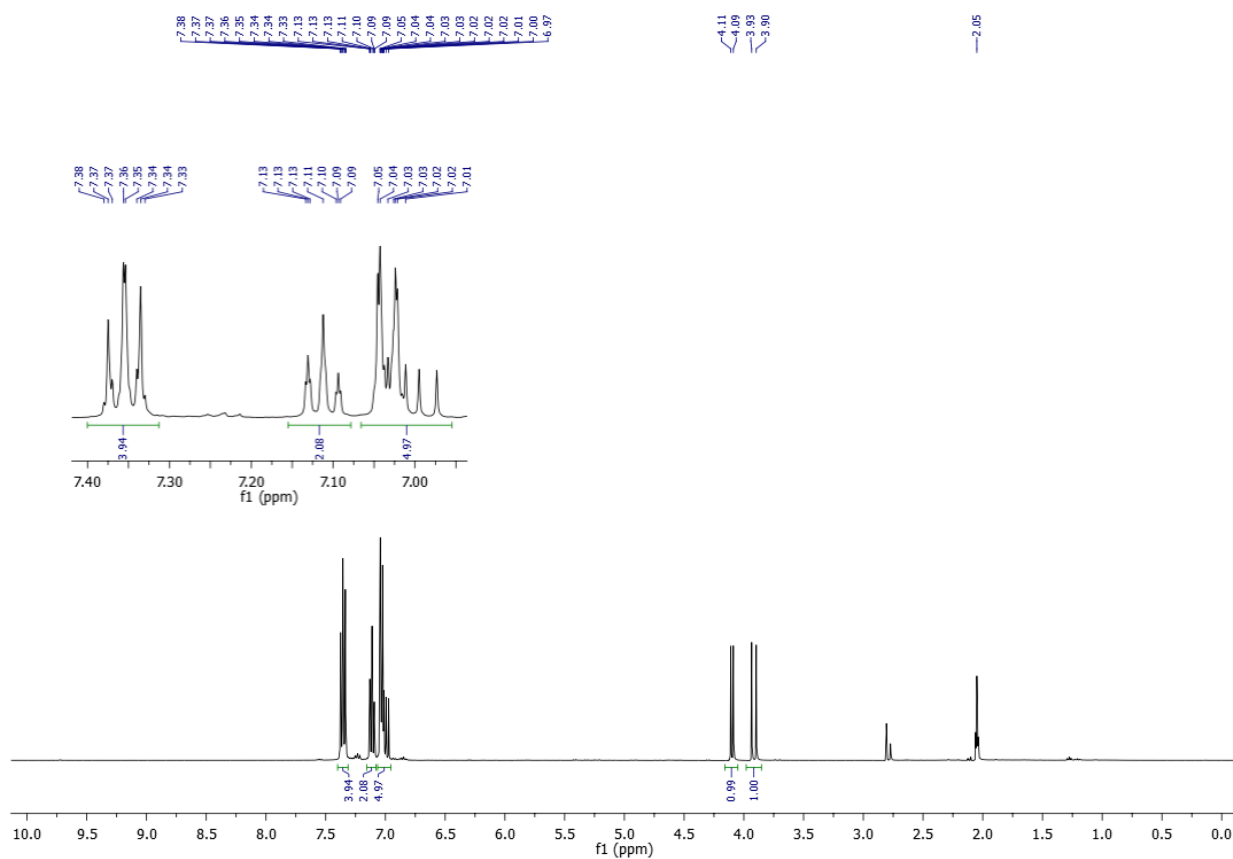

**Figure S3.** <sup>1</sup>H NMR spectrum of N,N-diphenylvinylamine (**2b**)

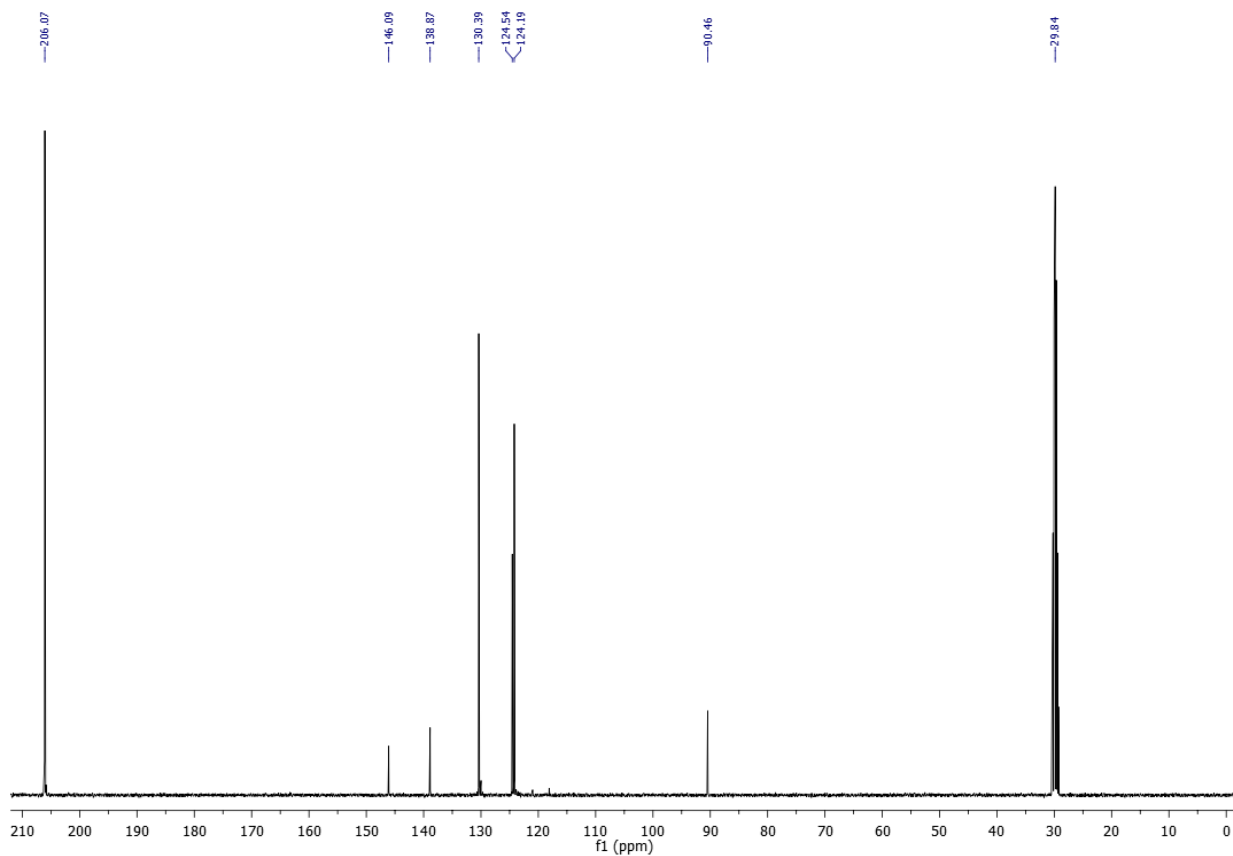

**Figure S4.** <sup>13</sup>C NMR spectrum of N,N-diphenylvinylamine (**2b**)

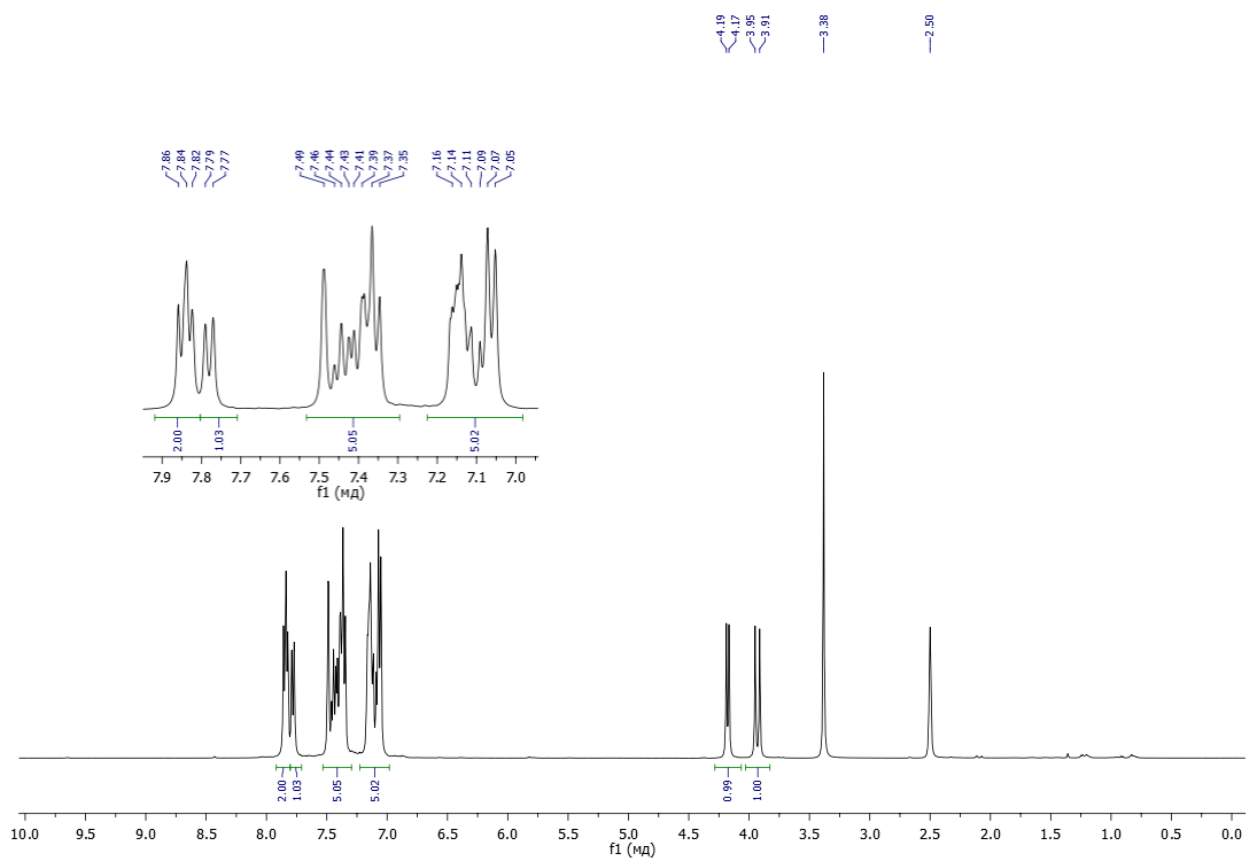

**Figure S5.** <sup>1</sup>H NMR spectrum of N-(β-naphthyl)-N-phenylvinylamine (2c)

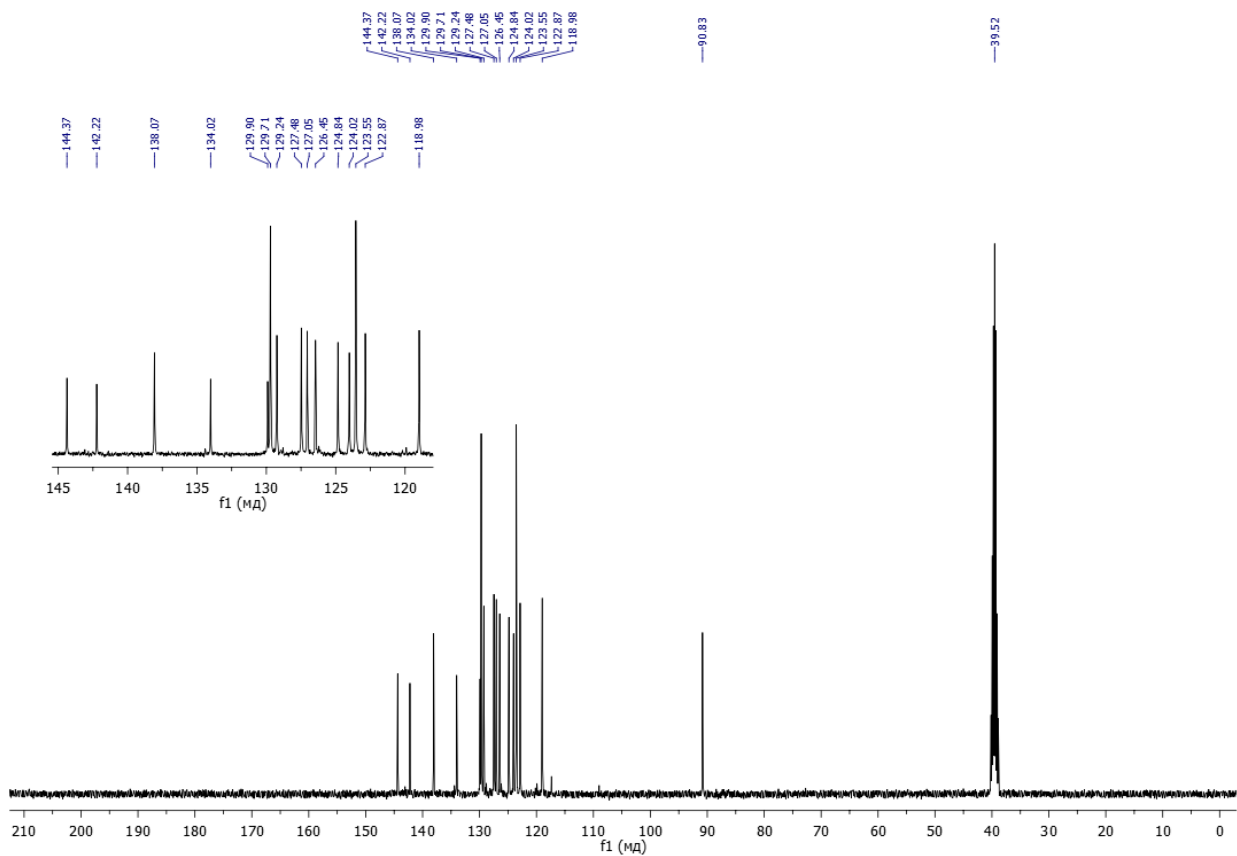

**Figure S6.** <sup>13</sup>C NMR spectrum of N-(β-naphthyl)-N-phenylvinylamine (2c)



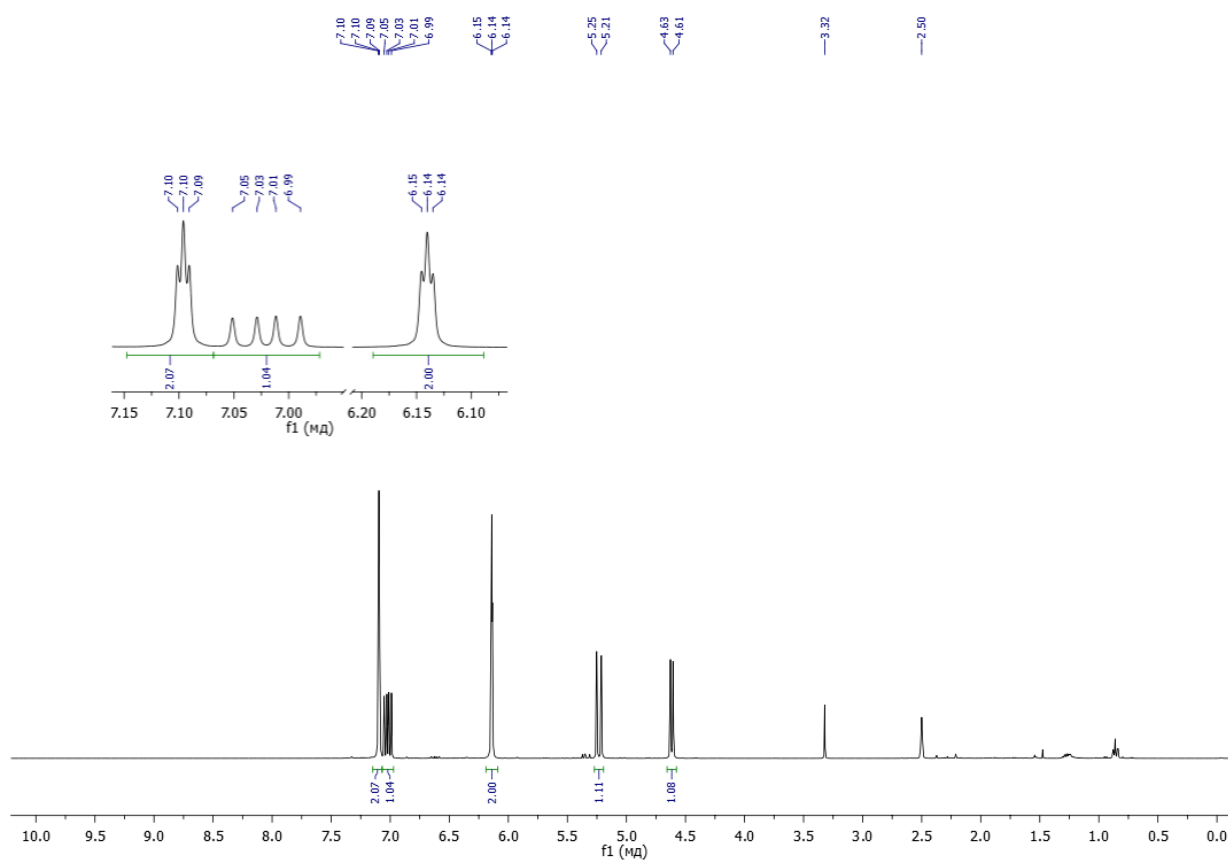

**Figure S7.** <sup>1</sup>H NMR spectrum of 1-vinyl-1H-pyrrole (**2d**)

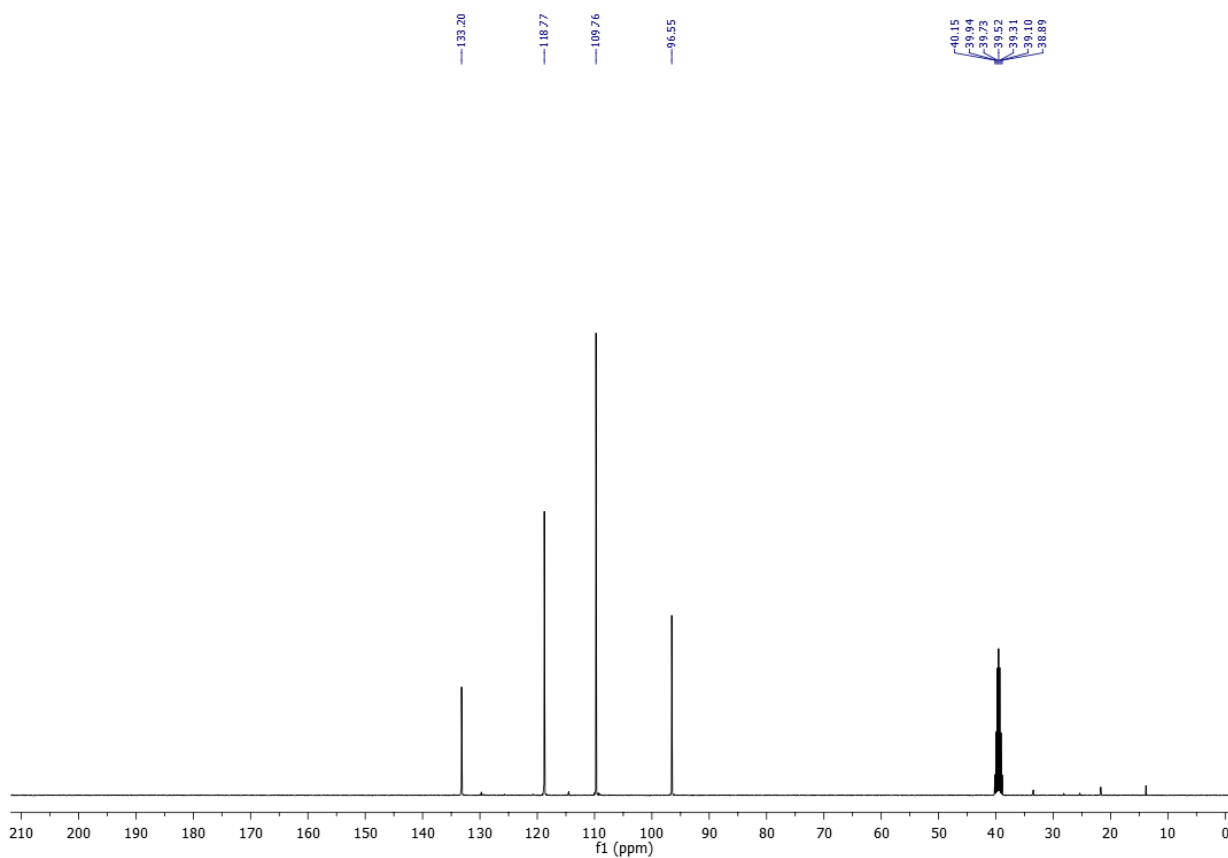

**Figure S8.** <sup>13</sup>C NMR spectrum of 1-vinyl-1H-pyrrole (**2d**)

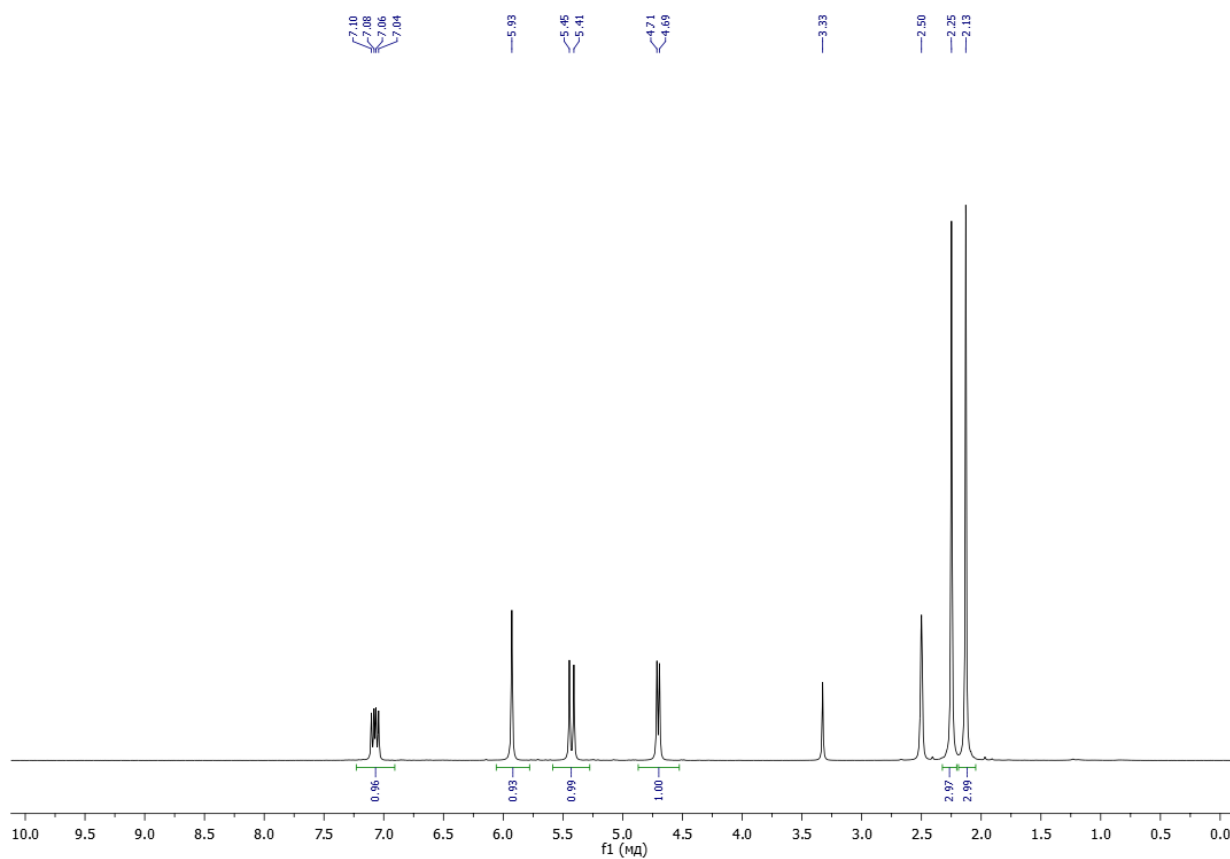

**Figure S9.** <sup>1</sup>H NMR spectrum of 3,5-dimethyl-1-vinyl-1H-pyrazole (**2e**)

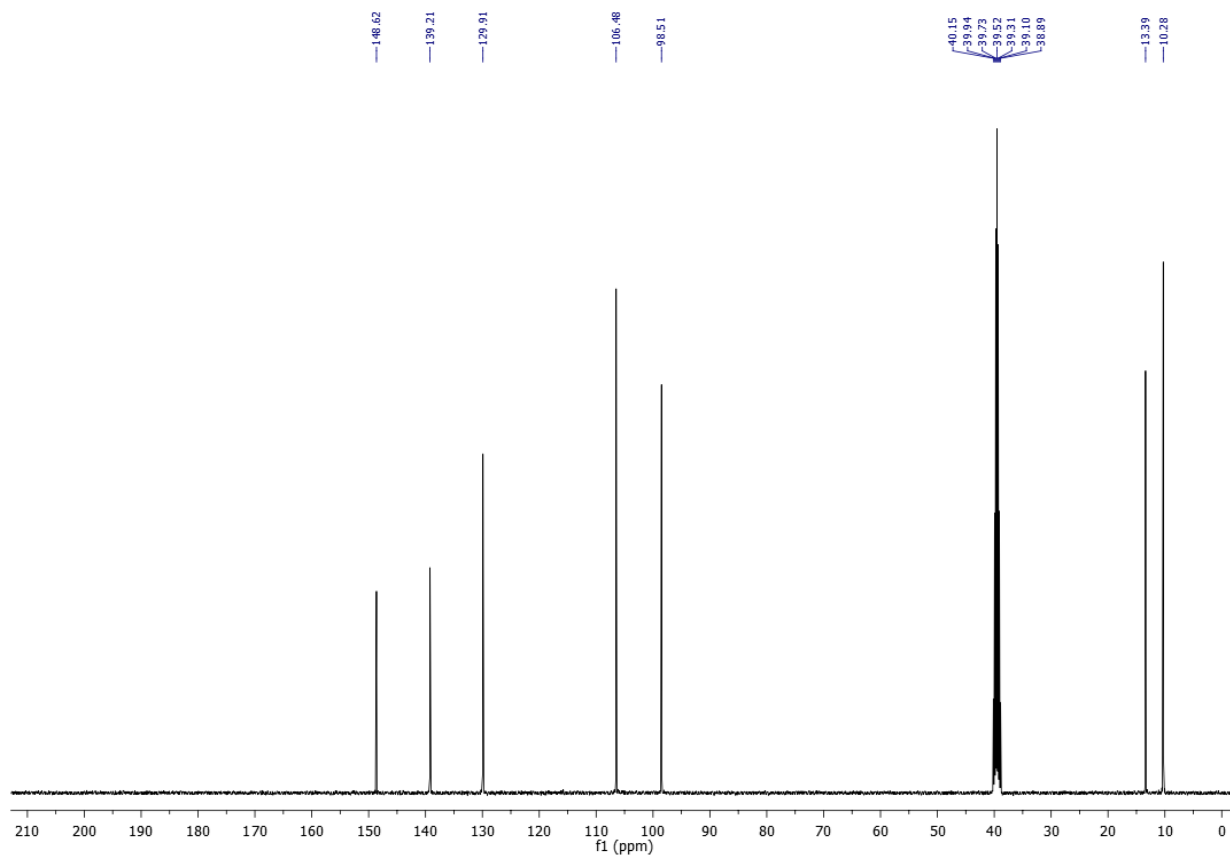

**Figure S10.** <sup>13</sup>C NMR spectrum of 3,5-dimethyl-1-vinyl-1H-pyrazole (**2e**)

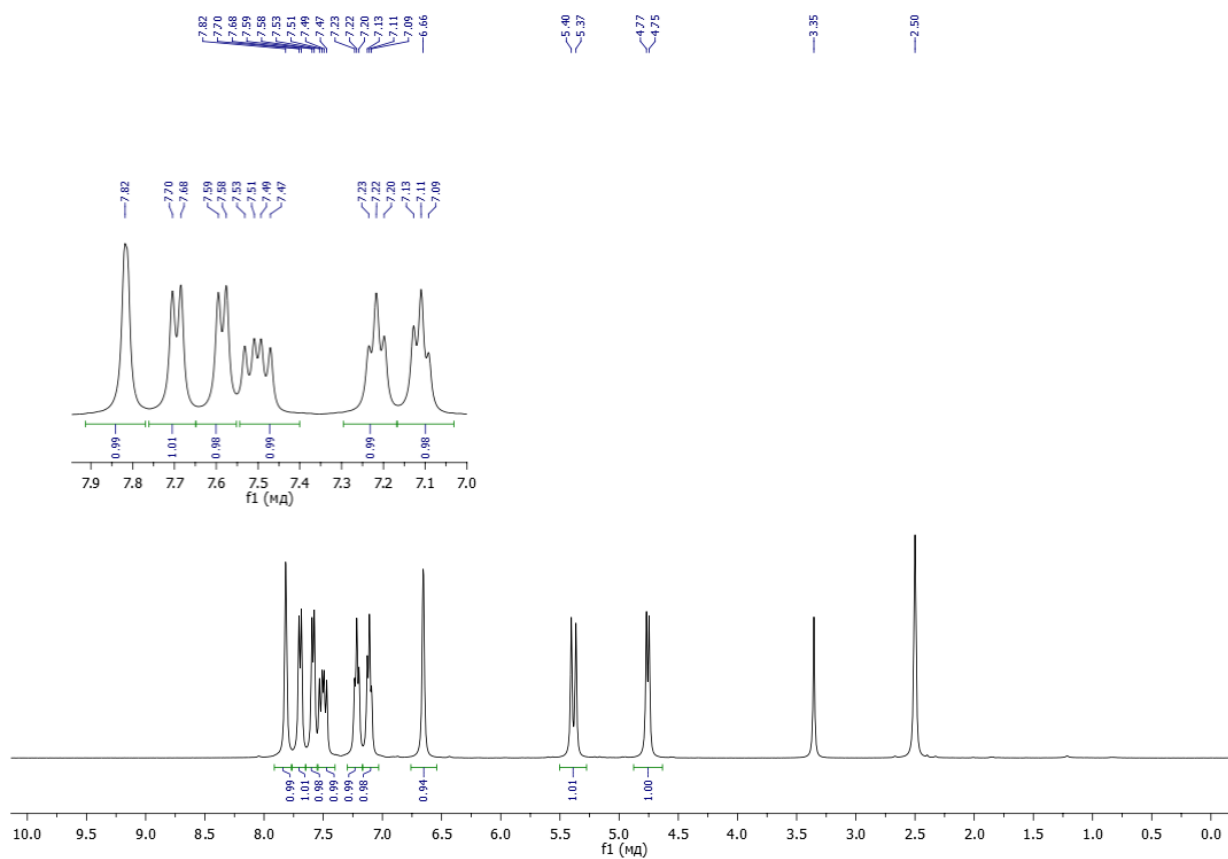

**Figure S11.** <sup>1</sup>H NMR spectrum of 1-vinyl-1*H*-indole (**2f**)

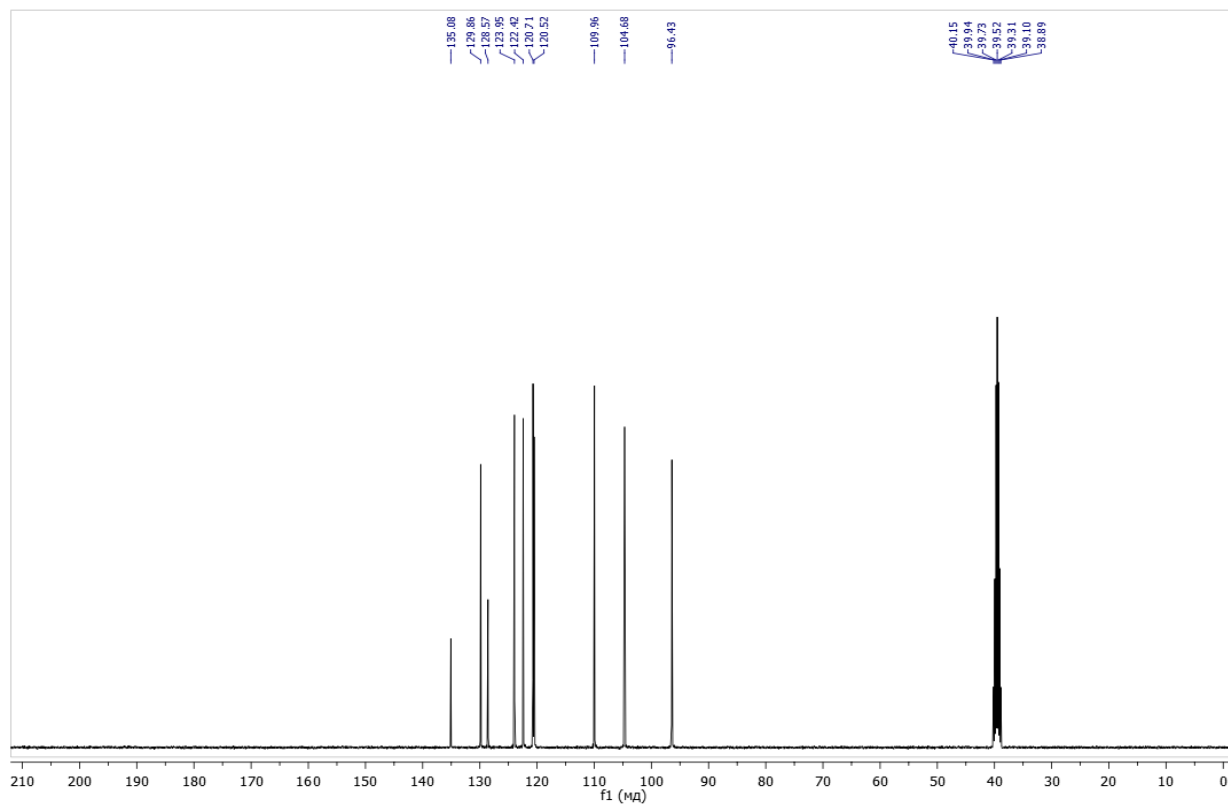

**Figure S12.** <sup>13</sup>C NMR spectrum of 1-vinyl-1*H*-indole (**2f**)

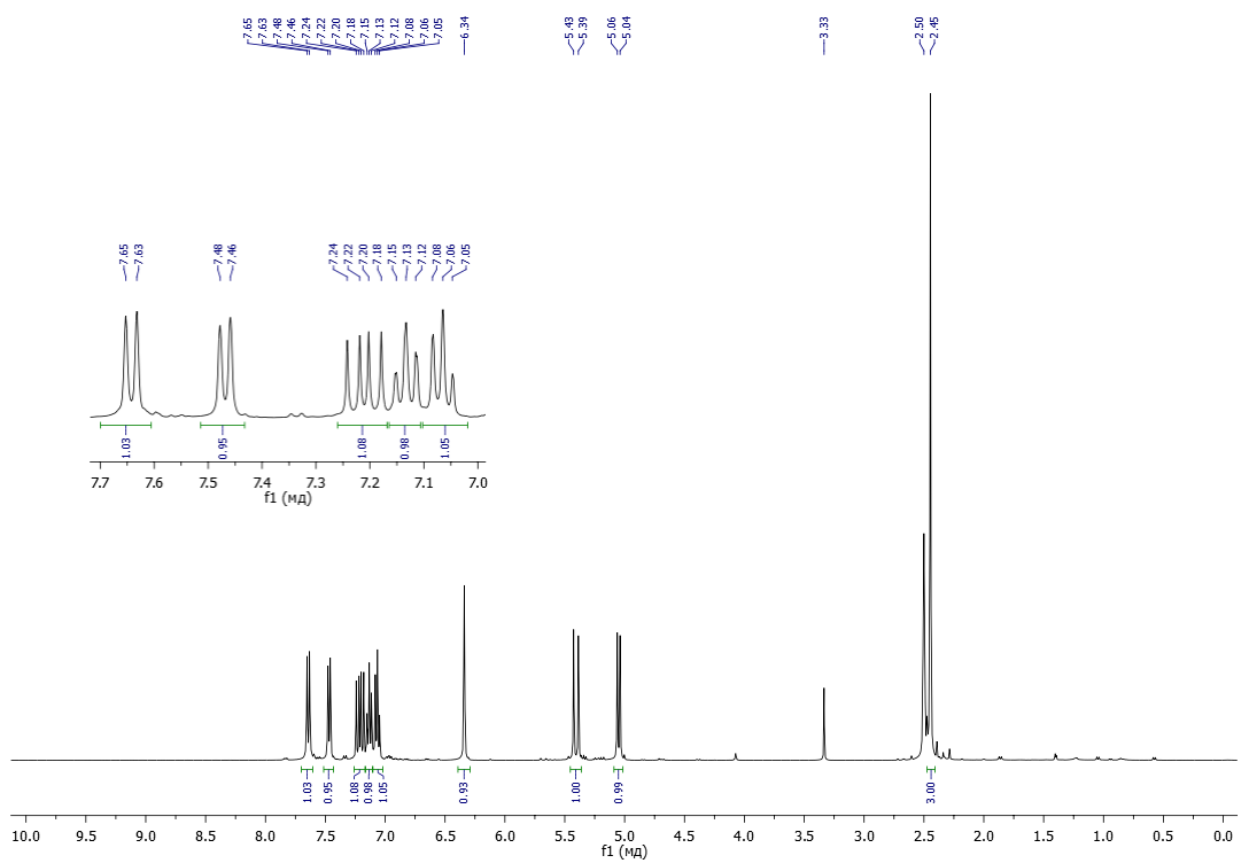

**Figure S13.**  $^1\text{H}$  NMR spectrum of 2-methyl-1-vinyl-1H-indole (**2g**)

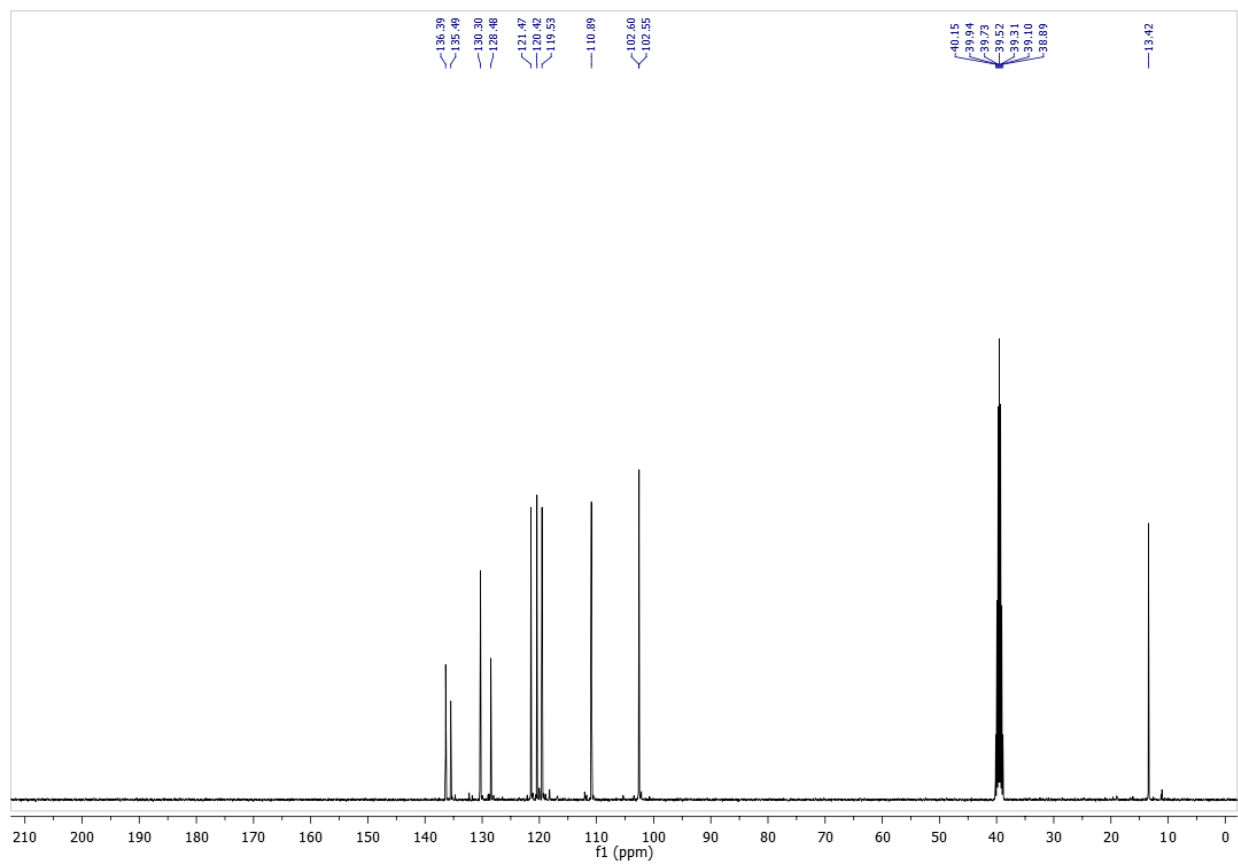

**Figure S14.**  $^{13}\text{C}$  NMR spectrum of 2-methyl-1-vinyl-1H-indole (**2g**)

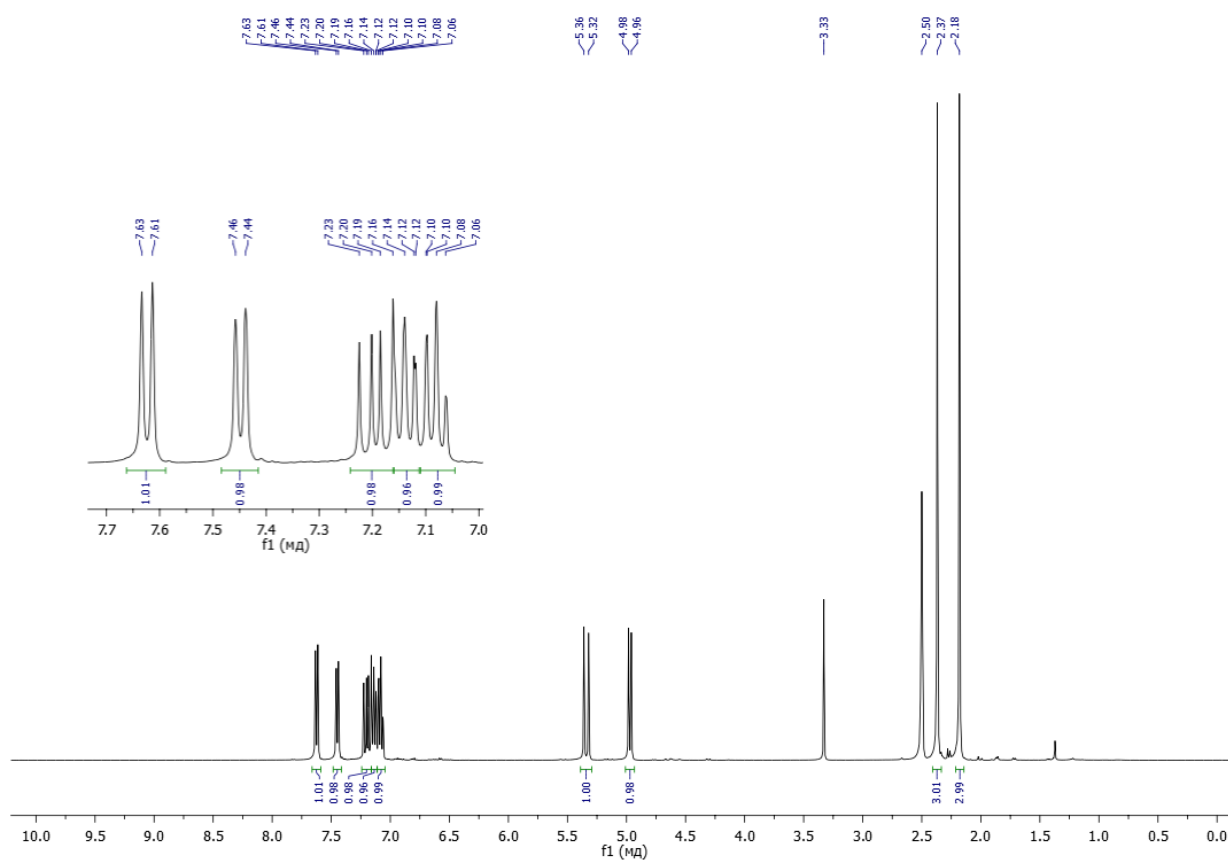

**Figure S15.** <sup>1</sup>H NMR spectrum of 2,3-dimethyl-1-vinyl-1*H*-indole (**2h**)

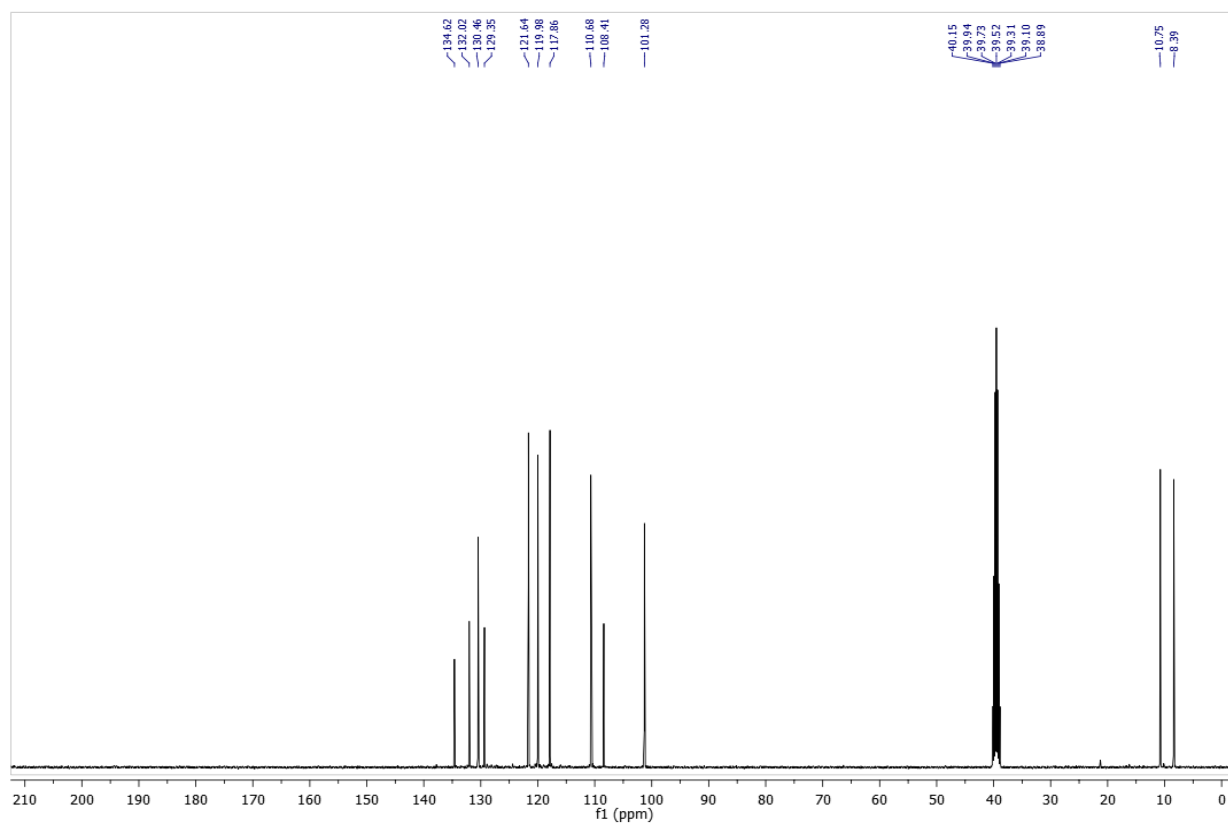

**Figure S16.** <sup>13</sup>C NMR spectrum of 2,3-dimethyl-1-vinyl-1*H*-indole (**2h**)

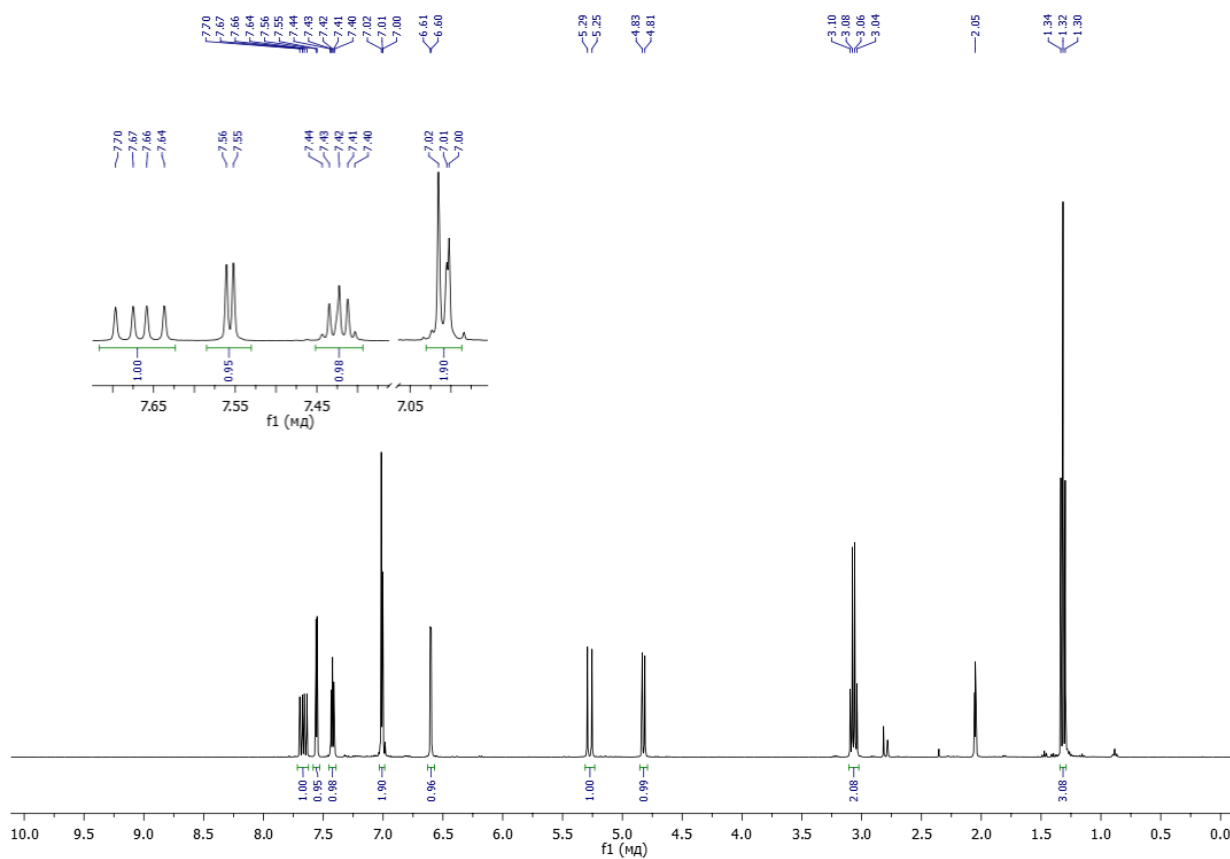

**Figure S17.** <sup>1</sup>H NMR spectrum of 7-ethyl-1-vinyl-1*H*-indole (**2i**)

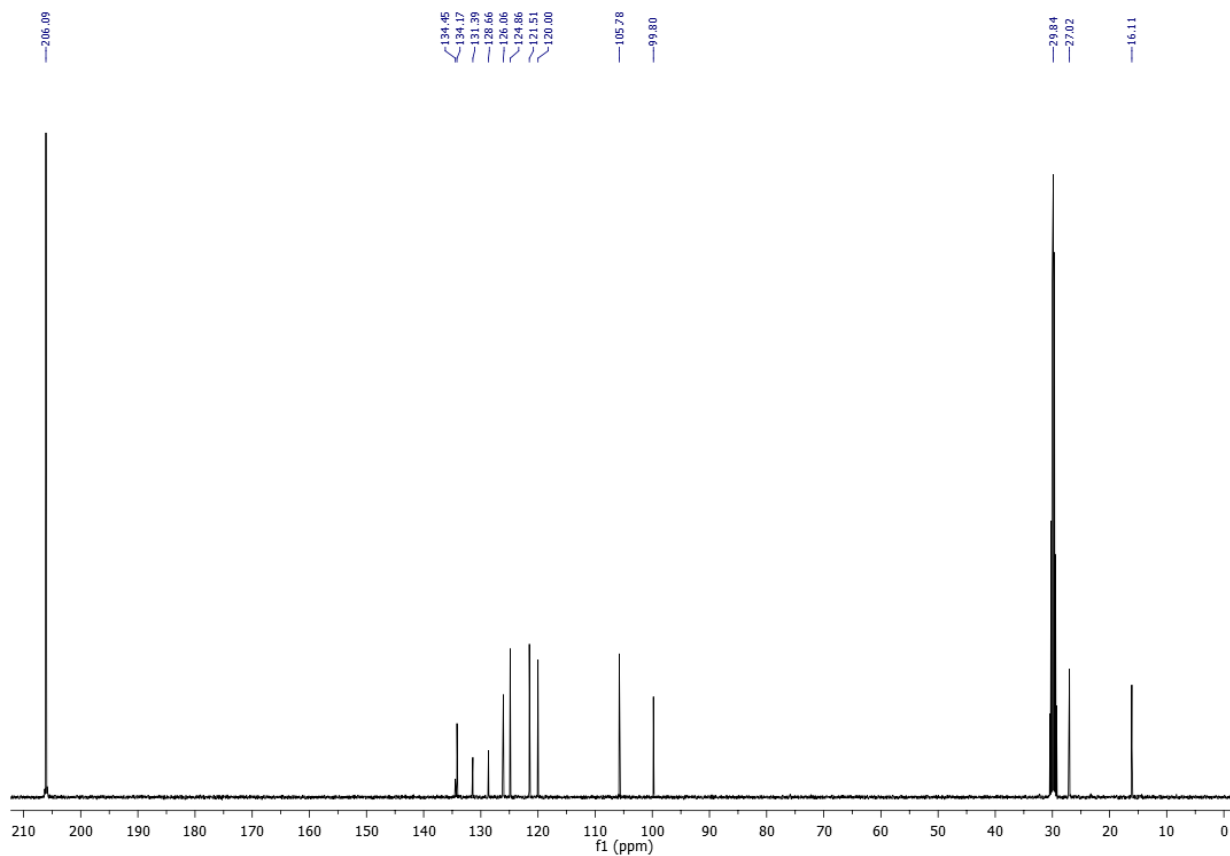

**Figure S18.** <sup>13</sup>C NMR spectrum of 7-ethyl-1-vinyl-1*H*-indole (**2i**)

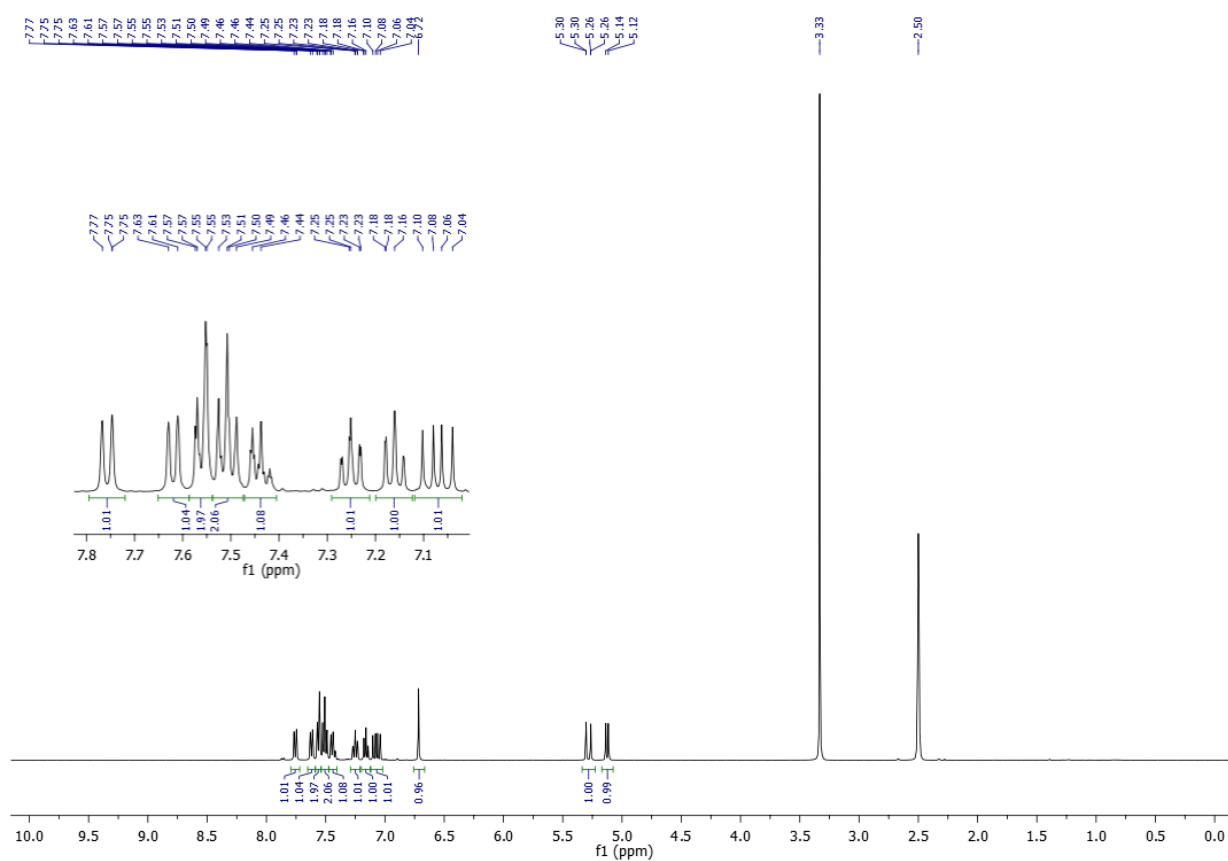

**Figure S19.** <sup>1</sup>H NMR spectrum of 2-phenyl-1-vinyl-1*H*-indole (**2j**)

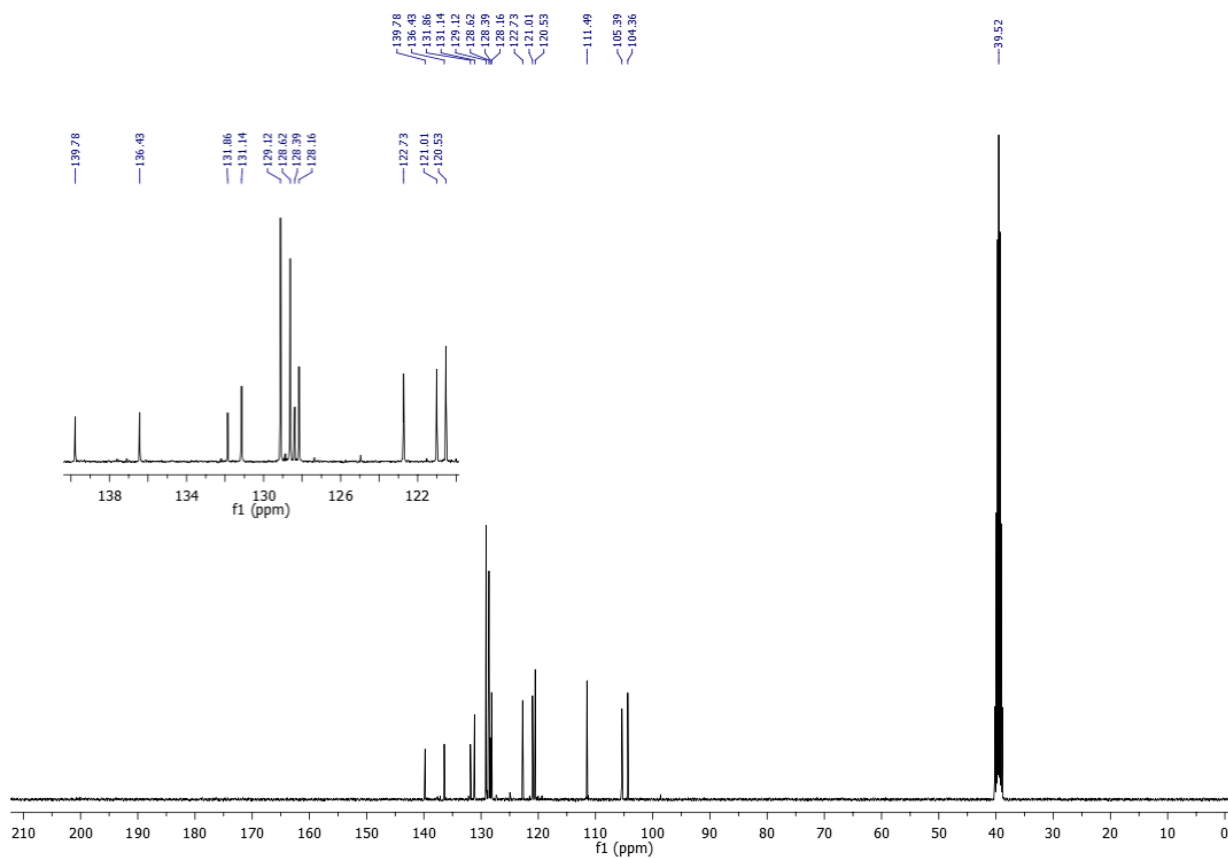

**Figure S20.** <sup>13</sup>C NMR spectrum of 2-phenyl-1-vinyl-1*H*-indole (**2j**)

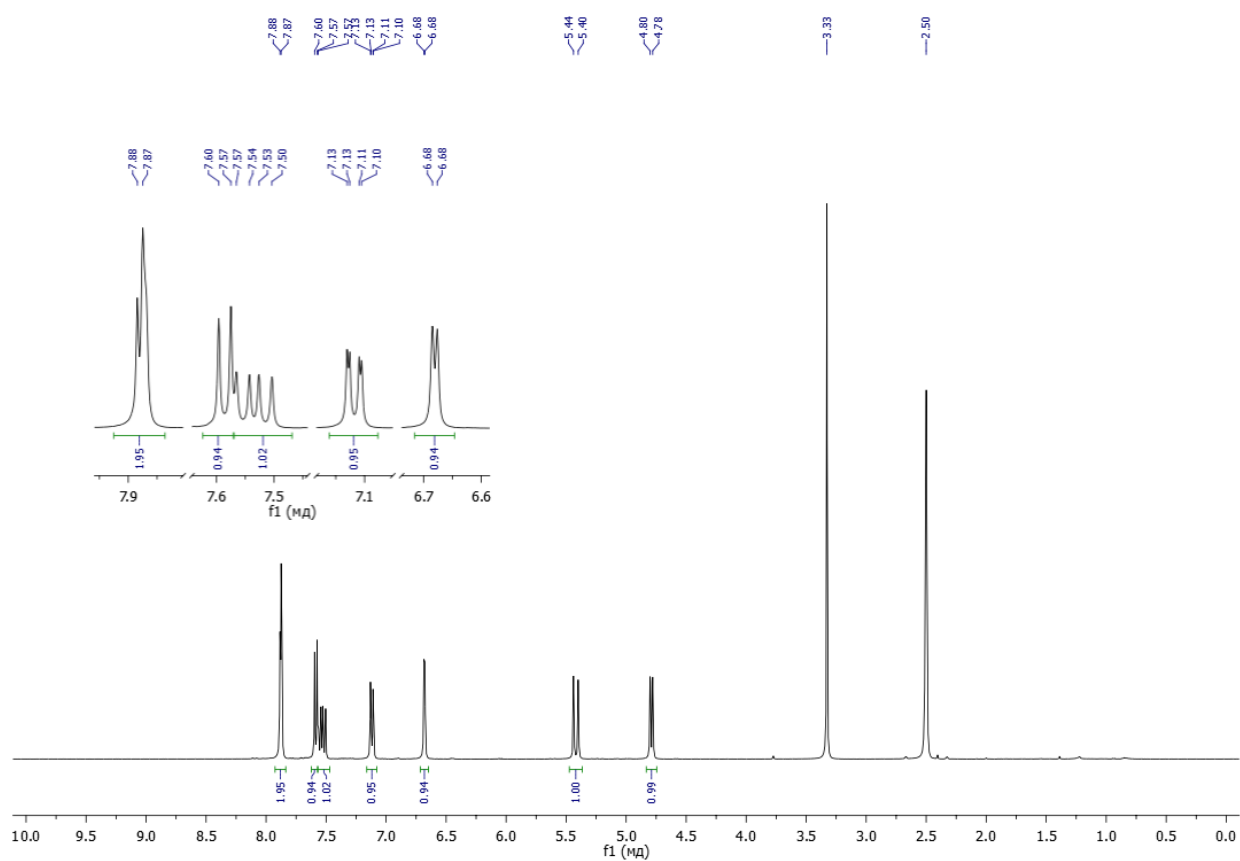

**Figure S21.** <sup>1</sup>H NMR spectrum of 6-chloro-1-vinyl-1*H*-indole (**2k**)

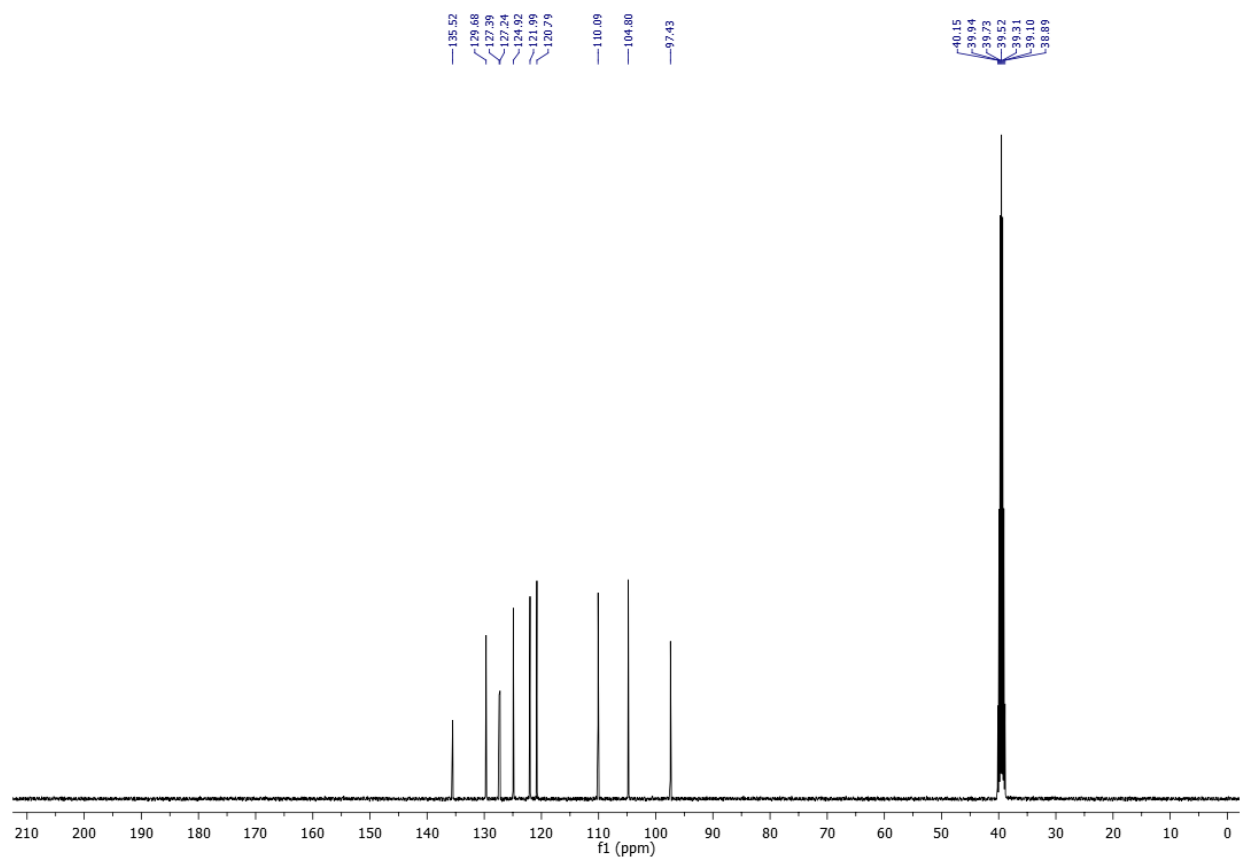

**Figure S22.** <sup>13</sup>C NMR spectrum of 6-chloro-1-vinyl-1*H*-indole (**2k**)



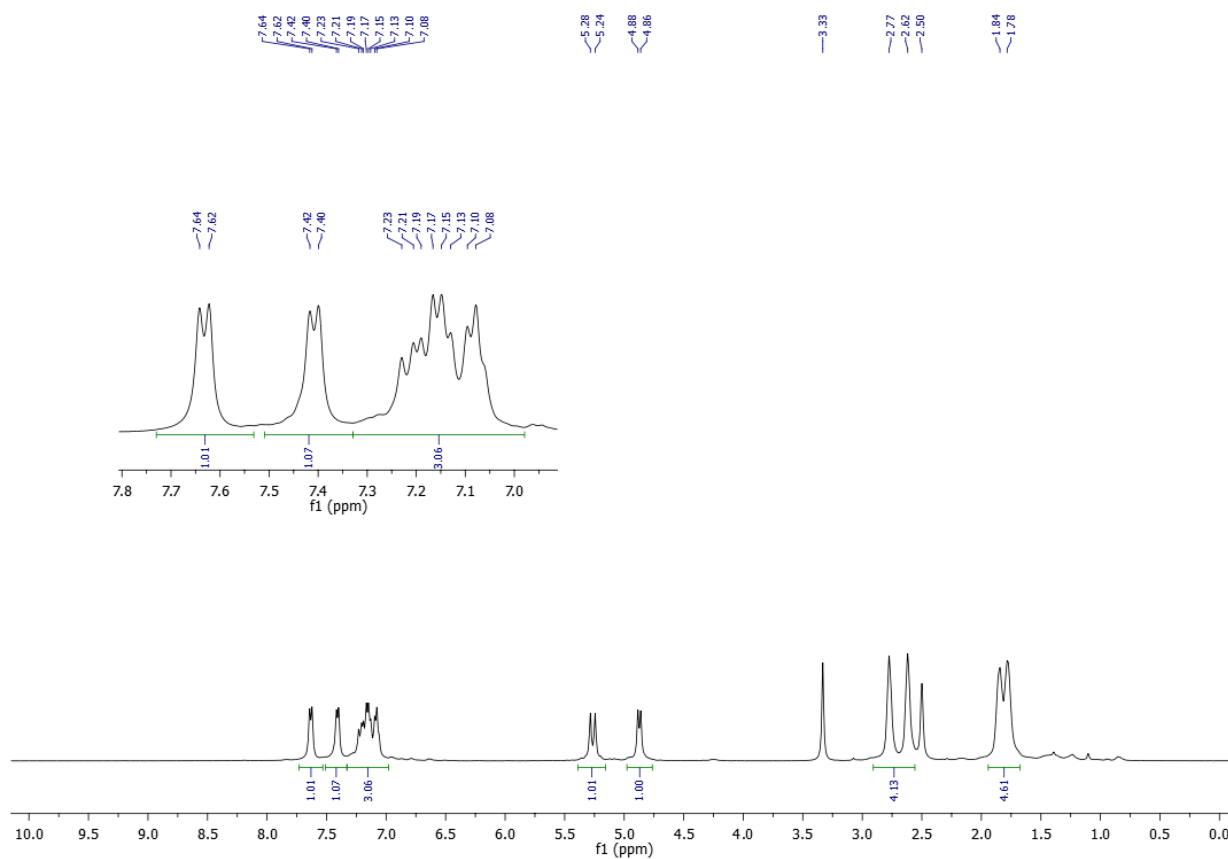

**Figure S23.**  $^1\text{H}$  NMR spectrum of 9-vinyl-2,3,4,9-tetrahydro-1*H*-carbazole (**2I**)

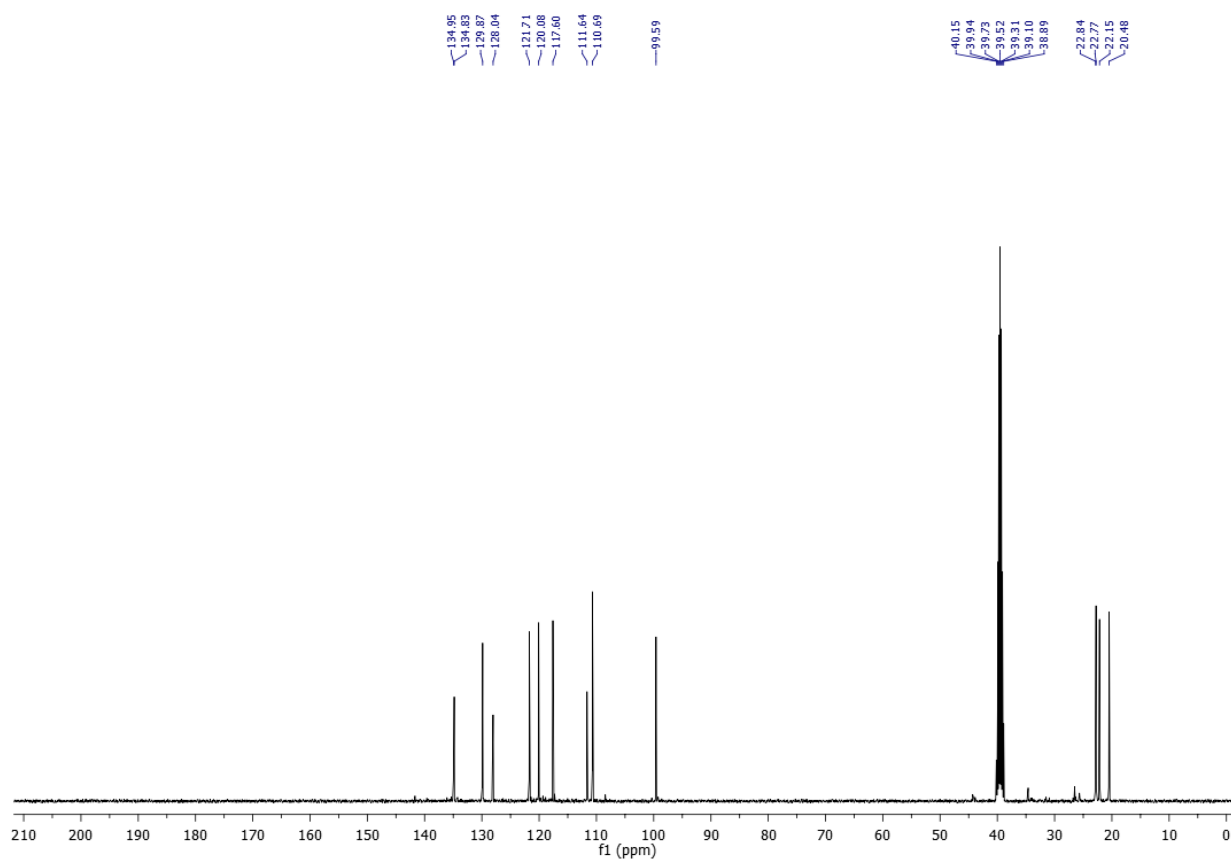

**Figure S24.**  $^{13}\text{C}$  NMR spectrum of 9-vinyl-2,3,4,9-tetrahydro-1*H*-carbazole (**2I**)

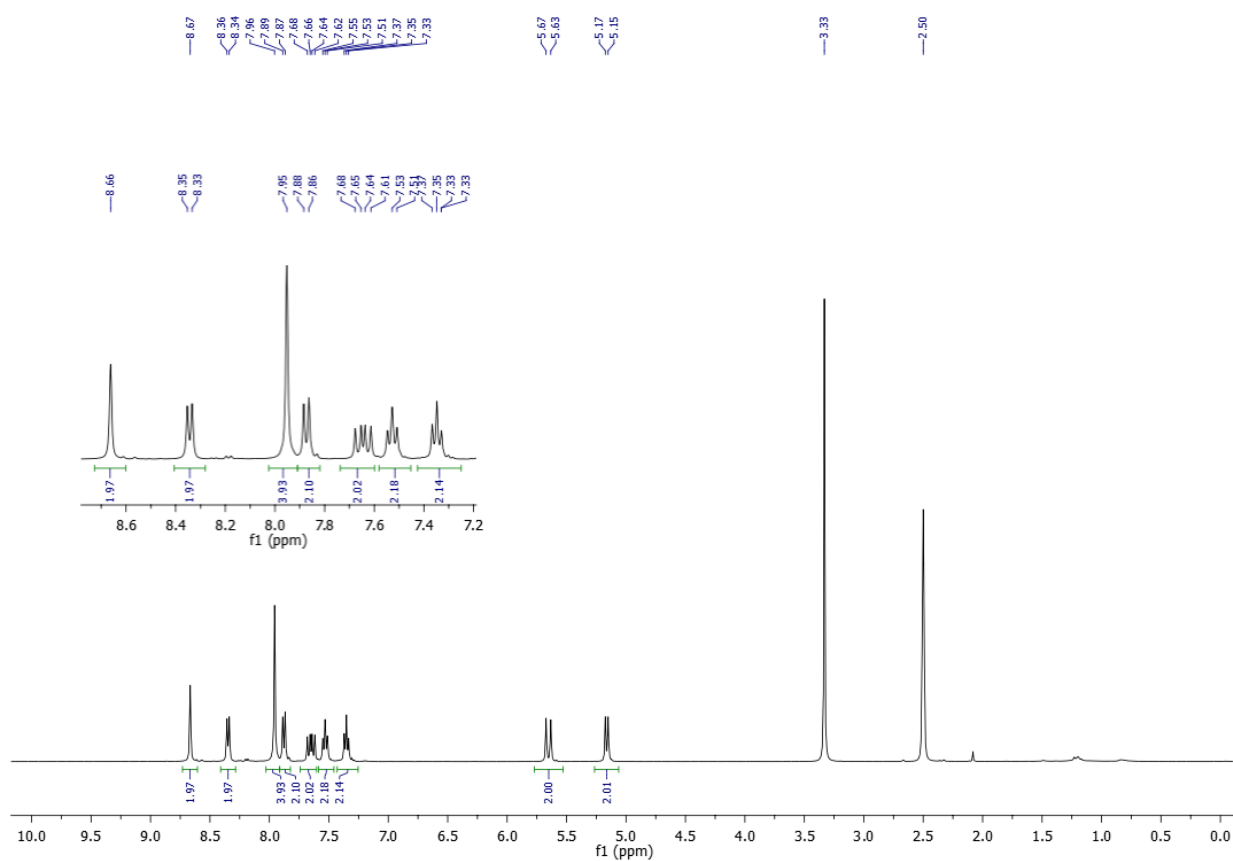

**Figure S25.**  $^1\text{H}$  NMR spectrum of 9,9'-divinyl-9H,9'H-3,3'-bicarbazole (2m)

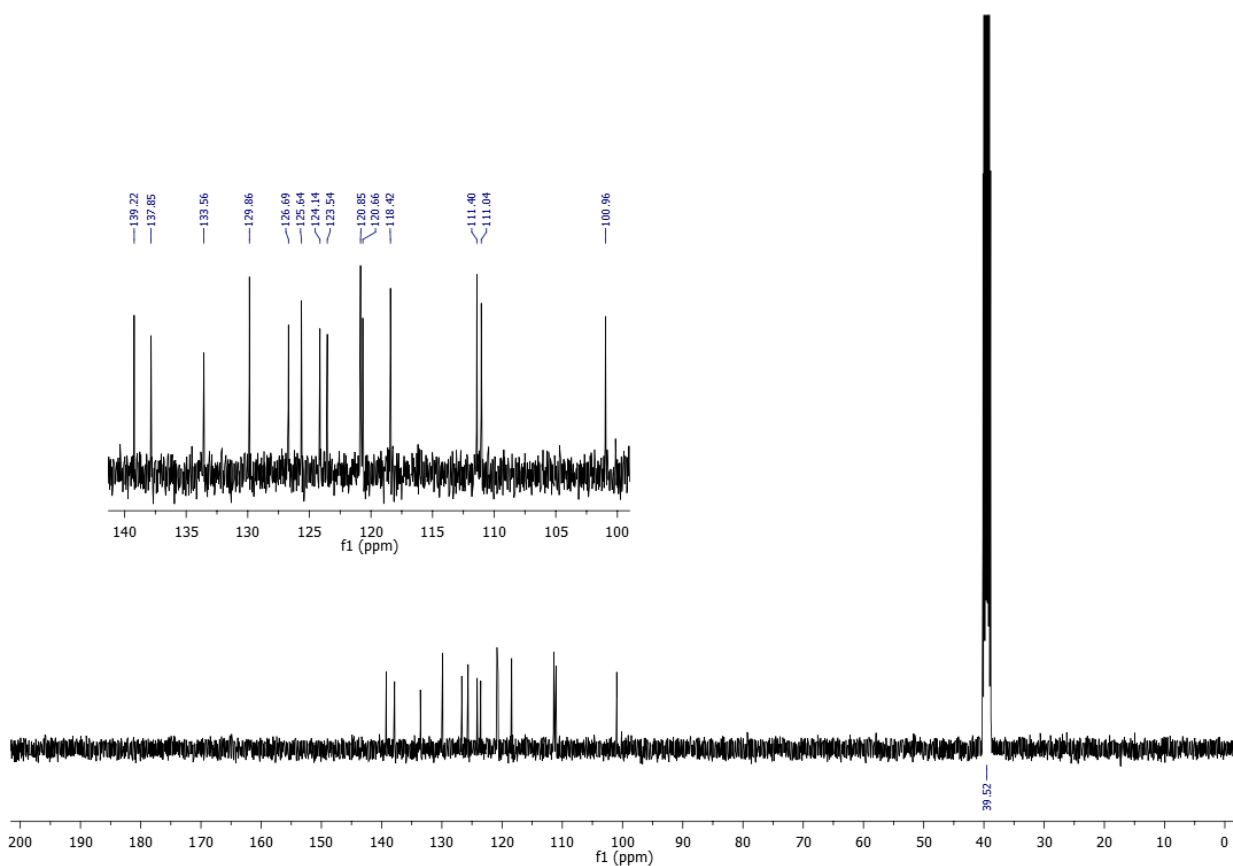

**Figure S26.**  $^{13}\text{C}$  NMR spectrum of 9,9'-divinyl-9H,9'H-3,3'-bicarbazole (2m)

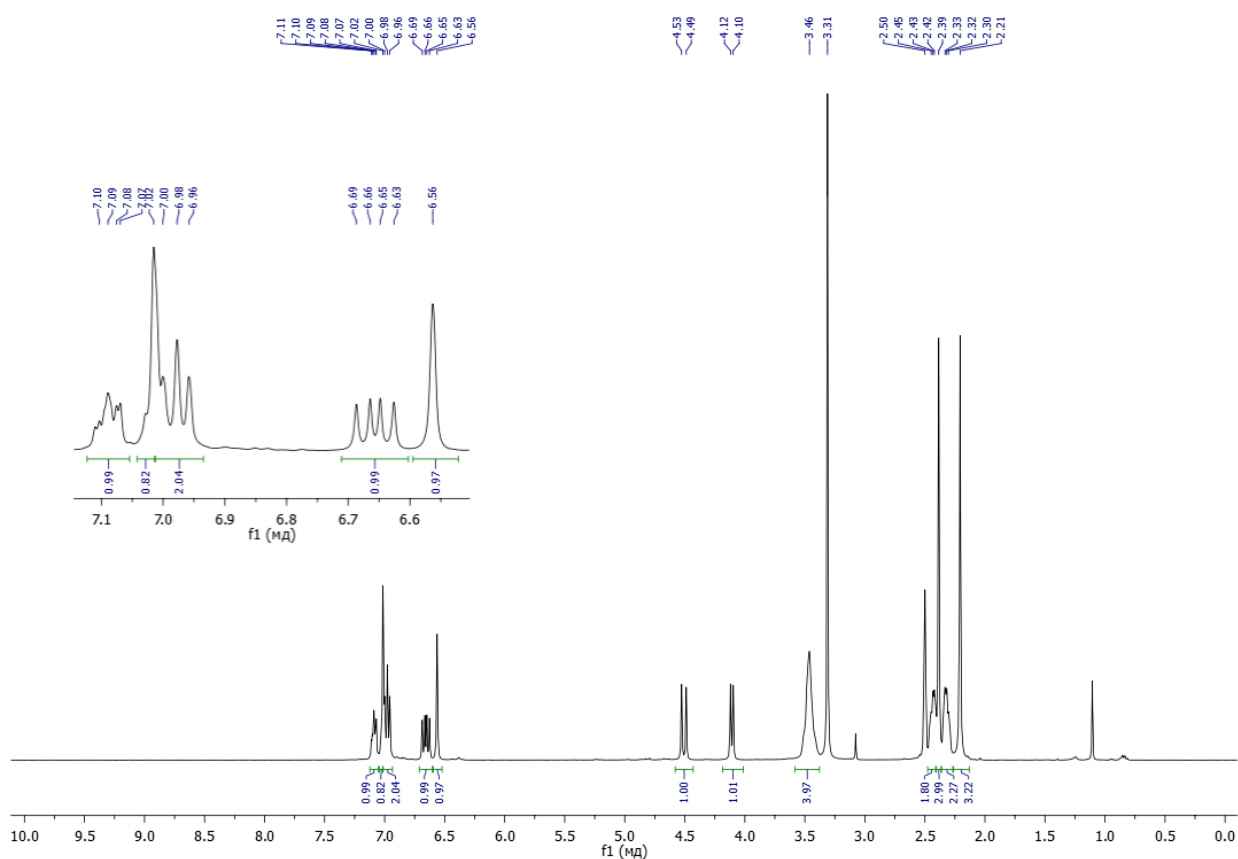

**Figure S27.** <sup>1</sup>H NMR spectrum of 2-methyl-4-(4-methylpiperazin-1-yl)-10-vinyl-10H-benzo[*b*]thieno[2,3-*e*][1,4]diazepine (**2n**)

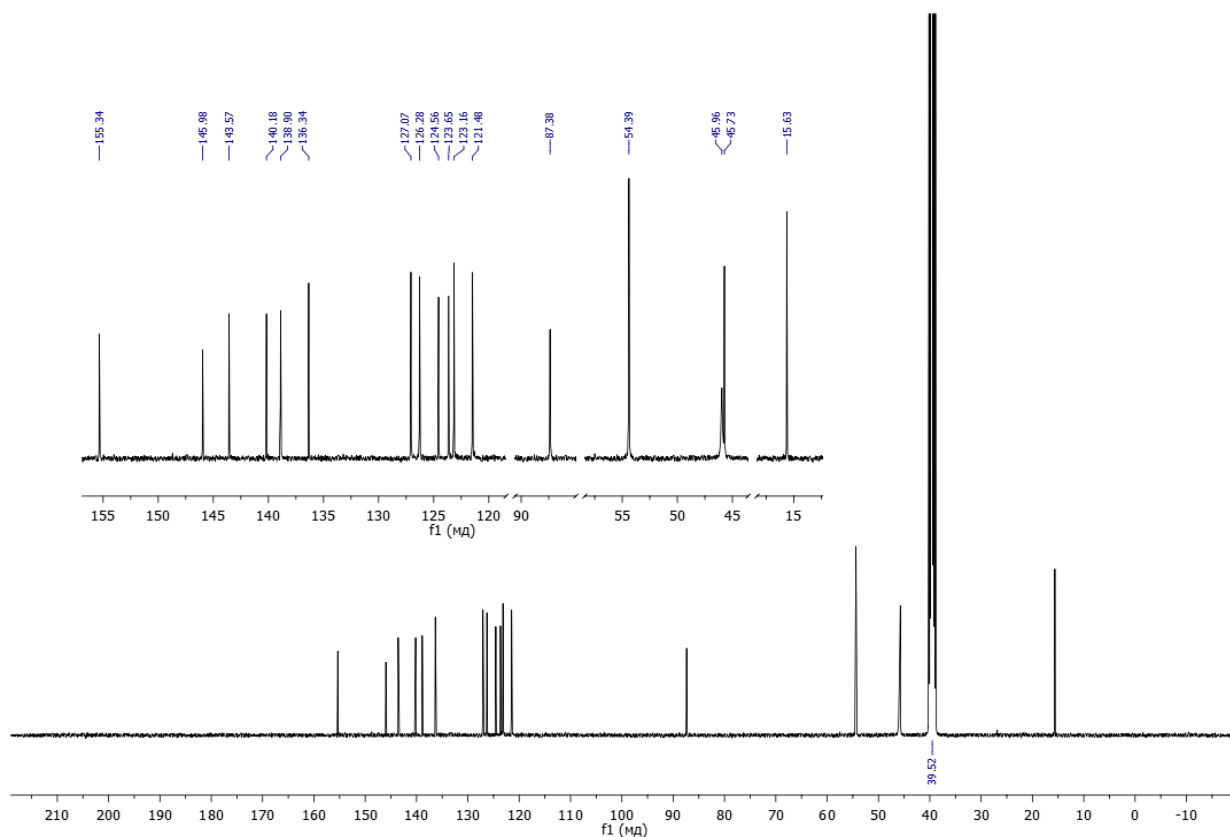

**Figure S28.** <sup>13</sup>C NMR spectrum of 2-methyl-4-(4-methylpiperazin-1-yl)-10-vinyl-10H-benzo[*b*]thieno[2,3-*e*][1,4]diazepine (**2n**)

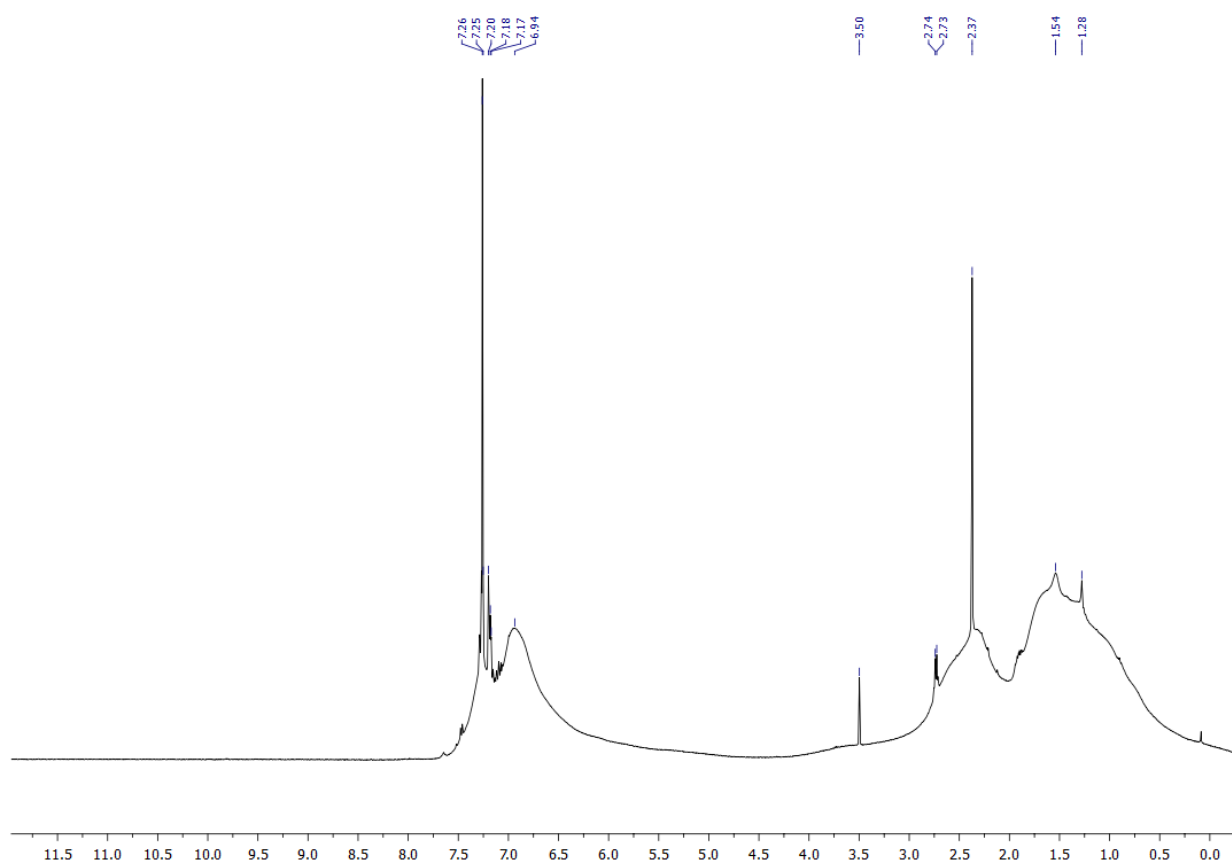

**Figure S29.**  $^1\text{H}$  NMR spectrum of poly-*N*-vinyl-1,2,3,4-tetrahydrocarbazole (**3I**)

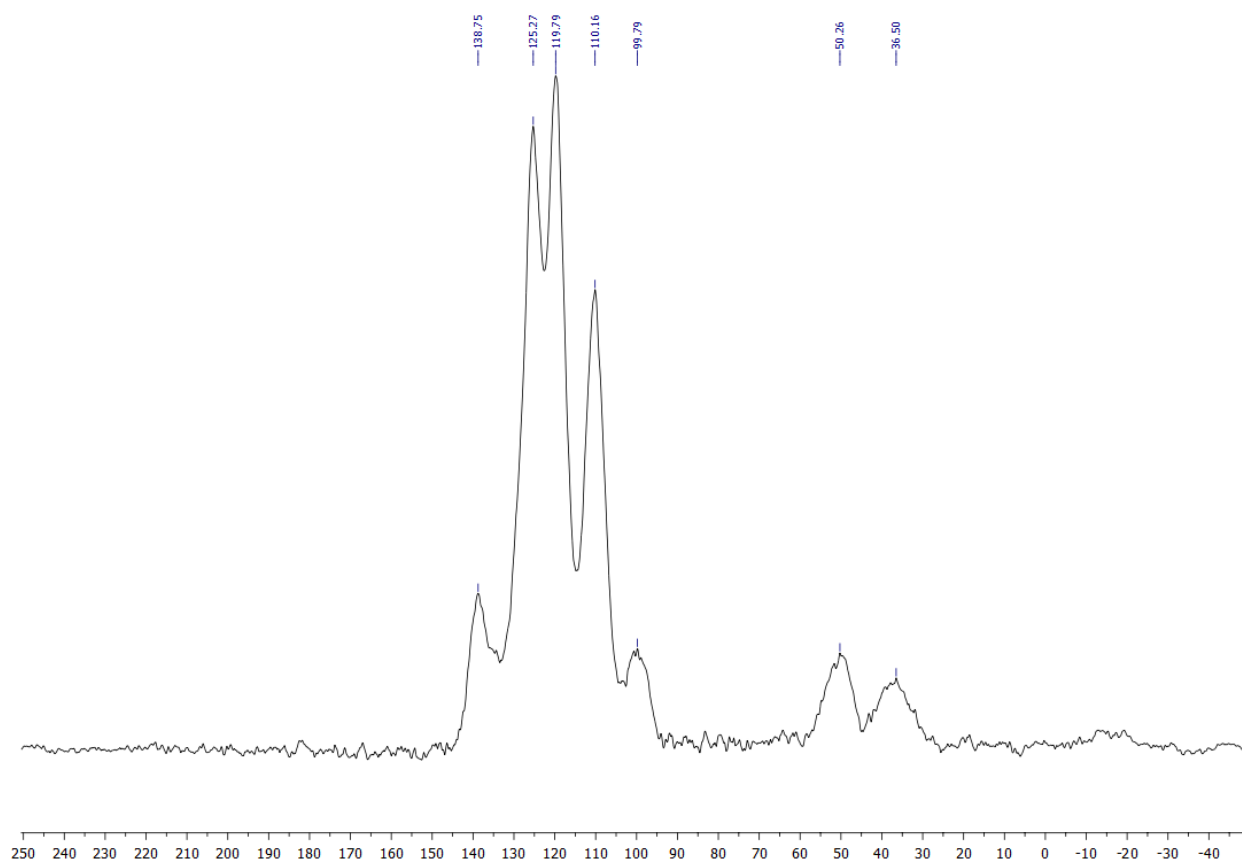

**Figure S30.** Solid state  $^{13}\text{C}$  NMR spectrum of poly-*N*-vinyl-1,2,3,4-tetrahydrocarbazole (**3I**)

## Crystal structures

### 5.1 X-ray crystallography data for 1-vinyl-1H-indole (2f)

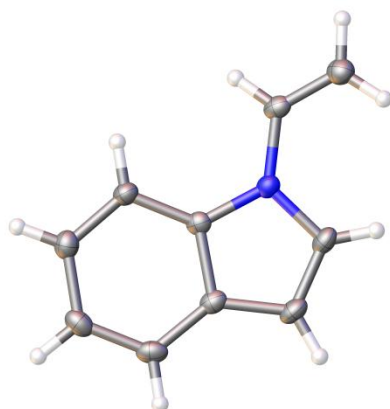

**Figure S31.** X-ray crystal structure of 1-vinyl-1*H*-indole (**2f**) (CCDC 1468160).

Table 1 Crystal data and structure refinement for **2f**

|                                       |                                                   |
|---------------------------------------|---------------------------------------------------|
| Empirical formula                     | C <sub>10</sub> H <sub>9</sub> N                  |
| Formula weight                        | 143.18                                            |
| Temperature/K                         | 100(2)                                            |
| Crystal system                        | orthorhombic                                      |
| Space group                           | Pna2 <sub>1</sub>                                 |
| a/Å                                   | 9.5037(17)                                        |
| b/Å                                   | 5.9344(10)                                        |
| c/Å                                   | 13.564(3)                                         |
| α/°                                   | 90.00                                             |
| β/°                                   | 90.00                                             |
| γ/°                                   | 90.00                                             |
| Volume/Å <sup>3</sup>                 | 765.0(2)                                          |
| Z                                     | 4                                                 |
| ρ <sub>calc</sub> /mg/mm <sup>3</sup> | 1.243                                             |
| m/mm <sup>-1</sup>                    | 0.073                                             |
| F(000)                                | 304.0                                             |
| Crystal size/mm <sup>3</sup>          | 0.31 × 0.09 × 0.08                                |
| 2θ range for data collection          | 6 to 55°                                          |
| Index ranges                          | -12 ≤ h ≤ 11, -7 ≤ k ≤ 7, -17 ≤ l ≤ 17            |
| Reflections collected                 | 5207                                              |
| Independent reflections               | 1682[R(int) = 0.0430]                             |
| Data/restraints/parameters            | 1682/1/100                                        |
| Goodness-of-fit on F <sup>2</sup>     | 1.027                                             |
| Final R indexes [I >= 2σ (I)]         | R <sub>1</sub> = 0.0429, wR <sub>2</sub> = 0.1040 |

Final R indexes [all data]  $R_1 = 0.0463$ ,  $wR_2 = 0.1080$   
 Largest diff. peak/hole / e Å<sup>-3</sup> 0.20/-0.20  
 Flack parameter -2(4)

Table 2 Fractional Atomic Coordinates ( $\times 10^4$ ) and Equivalent Isotropic Displacement Parameters ( $\text{\AA}^2 \times 10^3$ ) for .  $U_{eq}$  is defined as 1/3 of the trace of the orthogonalised  $U_{ij}$  tensor.

| Atom | x           | y        | z          | $U(eq)$ |
|------|-------------|----------|------------|---------|
| C5   | 8675.3(17)  | 9434(3)  | 7418.5(13) | 18.3(4) |
| C6   | 8406.4(19)  | 7786(3)  | 8125.9(14) | 20.1(4) |
| N1   | 9622.3(15)  | 9431(2)  | 6633.4(11) | 19.1(3) |
| C8   | 6605.3(19)  | 10269(3) | 8795.7(14) | 23.8(4) |
| C7   | 7366(2)     | 8237(3)  | 8809.4(14) | 23.5(4) |
| C2   | 7917.9(19)  | 11487(3) | 7378.3(14) | 19.9(4) |
| C3   | 8445(2)     | 12717(3) | 6548.4(15) | 23.2(4) |
| C10  | 11209(2)    | 7393(4)  | 5556.5(16) | 25.6(4) |
| C9   | 10529.0(18) | 7631(3)  | 6399.7(14) | 20.8(4) |
| C1   | 6870.1(19)  | 11892(3) | 8084.7(15) | 23.3(4) |
| C4   | 9463(2)     | 11439(3) | 6121.5(14) | 22.2(4) |

Table 3 Anisotropic Displacement Parameters ( $\text{\AA}^2 \times 10^3$ ) for . The Anisotropic displacement factor exponent takes the form:  $-2\pi^2[h^2a^{*2}U_{11} + \dots + 2hka \times b \times U_{12}]$

| Atom | $U_{11}$ | $U_{22}$ | $U_{33}$ | $U_{23}$ | $U_{13}$ | $U_{12}$ |
|------|----------|----------|----------|----------|----------|----------|
| C5   | 13.5(8)  | 18.1(9)  | 23.2(8)  | -0.4(7)  | -2.4(8)  | -2.0(6)  |
| C6   | 18.6(9)  | 17.5(8)  | 24.0(9)  | 1.6(7)   | -1.7(7)  | 0.2(6)   |
| N1   | 17.0(7)  | 17.7(7)  | 22.6(7)  | 2.4(6)   | -0.8(6)  | -0.6(6)  |
| C8   | 16.7(9)  | 29.7(10) | 24.8(9)  | -6.7(8)  | 0.8(7)   | -1.1(7)  |
| C7   | 21.4(10) | 25.7(10) | 23.3(8)  | 2.0(7)   | -1.1(8)  | -4.3(7)  |
| C2   | 17.7(9)  | 16.0(8)  | 26.1(9)  | 0.0(7)   | -4.8(8)  | -2.4(7)  |
| C3   | 23.4(9)  | 16.2(8)  | 30.1(9)  | 4.5(8)   | -5.5(8)  | -2.1(6)  |
| C10  | 23.4(10) | 21.7(9)  | 31.7(9)  | -0.1(7)  | 1.2(8)   | -1.5(8)  |
| C9   | 17.0(9)  | 16.2(8)  | 29.1(9)  | 0.8(7)   | -3.7(7)  | -1.9(6)  |
| C1   | 16.8(9)  | 20.9(9)  | 32.2(10) | -4.5(8)  | -5.6(8)  | 2.5(7)   |
| C4   | 21.6(9)  | 18.5(9)  | 26.7(9)  | 6.2(7)   | -3.8(7)  | -4.0(7)  |

Table 4 Bond Lengths for **2f**.

| Atom | Atom | Length/\AA | Atom | Atom | Length/\AA |
|------|------|------------|------|------|------------|
| C5   | C6   | 1.394(3)   | C8   | C7   | 1.407(3)   |
| C5   | N1   | 1.394(2)   | C8   | C1   | 1.386(3)   |
| C5   | C2   | 1.416(3)   | C2   | C3   | 1.432(3)   |

|    |    |          |     |    |          |
|----|----|----------|-----|----|----------|
| C6 | C7 | 1.381(3) | C2  | C1 | 1.403(3) |
| N1 | C9 | 1.408(2) | C3  | C4 | 1.359(3) |
| N1 | C4 | 1.388(2) | C10 | C9 | 1.321(3) |

Table 5 Bond Angles for **2f**.

| Atom | Atom | Atom | Angle/°    | Atom | Atom | Atom | Angle/°    |
|------|------|------|------------|------|------|------|------------|
| C6   | C5   | N1   | 130.03(16) | C6   | C7   | C8   | 121.66(18) |
| C6   | C5   | C2   | 122.47(16) | C5   | C2   | C3   | 106.91(15) |
| N1   | C5   | C2   | 107.46(15) | C1   | C2   | C5   | 118.80(17) |
| C7   | C6   | C5   | 117.24(16) | C1   | C2   | C3   | 134.28(18) |
| C5   | N1   | C9   | 124.61(14) | C4   | C3   | C2   | 107.44(16) |
| C4   | N1   | C5   | 108.10(15) | C10  | C9   | N1   | 125.11(17) |
| C4   | N1   | C9   | 127.25(16) | C8   | C1   | C2   | 119.05(17) |
| C1   | C8   | C7   | 120.77(17) | C3   | C4   | N1   | 110.09(17) |

Table 6 Hydrogen Atom Coordinates ( $\text{\AA} \times 10^4$ ) and Isotropic Displacement Parameters ( $\text{\AA}^2 \times 10^3$ ) for **2f**.

| Atom | x     | y     | z    | U(eq) |
|------|-------|-------|------|-------|
| H6   | 8906  | 6440  | 8137 | 24    |
| H8   | 5916  | 10528 | 9269 | 29    |
| H7   | 7164  | 7169  | 9291 | 28    |
| H3   | 8145  | 14131 | 6340 | 28    |
| H10A | 11105 | 8465  | 5062 | 31    |
| H10B | 11790 | 6154  | 5458 | 31    |
| H9   | 10660 | 6524  | 6876 | 25    |
| H1   | 6360  | 13229 | 8076 | 28    |
| H4   | 9979  | 11851 | 5567 | 27    |

## Experimental

Crystals of  $\text{C}_{10}\text{H}_9\text{N}$  were isolated at +11 °C, kept and transferred under cooling. A suitable crystal of  $\text{C}_{10}\text{H}_9\text{N}$  was selected and placed on a diffractometer. The crystal was kept at 100(2) K during data collection. Using Olex2 [1], the structure was solved with the ShelXS [2] structure solution program using Direct Methods and refined with the ShelXL [3] refinement package using CGLS minimisation.

1. O. V. Dolomanov, L. J. Bourhis, R. J. Gildea, J. A. K. Howard and H. Puschmann, OLEX2: a complete structure solution, refinement and analysis program. *J. Appl. Cryst.* (2009). 42, 339-341.
2. SHELXS, G.M. Sheldrick, *Acta Cryst.* (2008). A64, 112-122
3. SHELXL, G.M. Sheldrick, *Acta Cryst.* (2008). A64, 112-122

**Crystal Data.**  $\text{C}_{10}\text{H}_9\text{N}$ ,  $M = 143.18$ , orthorhombic,  $a = 9.5037(17) \text{ \AA}$ ,  $b = 5.9344(10) \text{ \AA}$ ,  $c = 13.564(3) \text{ \AA}$ ,  $V = 765.0(2) \text{ \AA}^3$ ,  $T = 100(2)$ , space group  $\text{Pna}2_1$  (no. 33),  $Z = 4$ ,  $\mu(\text{Mo K}\alpha) = 0.073$ , 5207 reflections measured, 1682 unique ( $R_{\text{int}} = 0.0430$ ) which were used in all calculations. The final  $wR_2$  was 0.1080 (all data) and  $R_1$  was 0.0429 ( $>2\sigma(I)$ ).

## 5.2 X-ray crystallography data for 9,9'-divinyl-9*H*,9'*H*-3,3'-bicarbazole (**2m**)

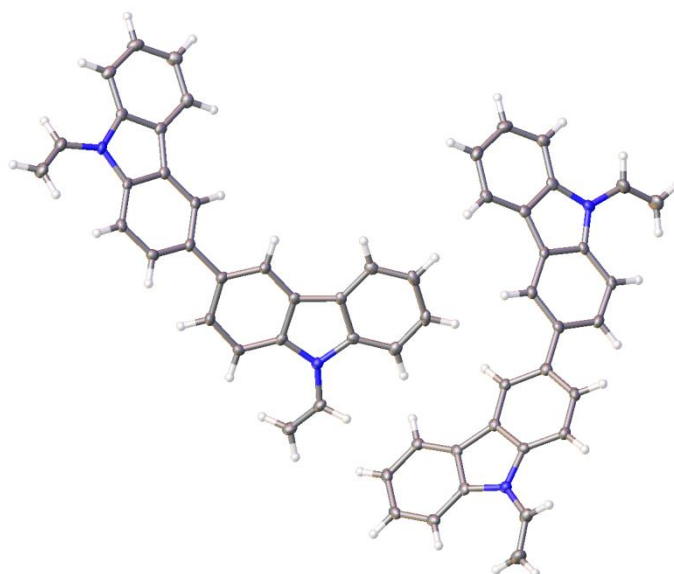

**Figure S32.** X-ray crystal structure of 9,9'-divinyl-9*H*,9'*H*-3,3'-bicarbazole (**2m**) (CCDC 1585616).

Crystal data for  $C_{28}H_{20}N_2$  ( $M = 384.46$  g/mol): monoclinic, space group  $C2/c$  (no. 15),  $a = 60.6699(17)$  Å,  $b = 3.94085(11)$  Å,  $c = 32.2588(11)$  Å,  $\beta = 104.099(3)^\circ$ ,  $V = 7480.5(4)$  Å<sup>3</sup>,  $Z = 16$ ,  $T = 100.01(10)$  K,  $\mu(\text{MoK}\alpha) = 0.080$  mm<sup>-1</sup>,  $D_{\text{calc}} = 1.365$  g/cm<sup>3</sup>, 33586 reflections measured ( $6.468^\circ \leq 2\theta \leq 55^\circ$ ), 8540 unique ( $R_{\text{int}} = 0.0468$ ,  $R_{\text{sigma}} = 0.0438$ ) which were used in all calculations. The final  $R_1$  was 0.0758 ( $I > 2\sigma(I)$ ) and  $wR_2$  was 0.1683 (all data).

**Table S1.** Crystal data and structure refinement for 9,9'-divinyl-9*H*,9'*H*-3,3'-bicarbazole (**2m**)

|                                       |                   |
|---------------------------------------|-------------------|
| Empirical formula                     | $C_{28}H_{20}N_2$ |
| Formula weight                        | 384.46            |
| Temperature/K                         | 100.01(10)        |
| Crystal system                        | monoclinic        |
| Space group                           | $C2/c$            |
| $a/\text{\AA}$                        | 60.6699(17)       |
| $b/\text{\AA}$                        | 3.94085(11)       |
| $c/\text{\AA}$                        | 32.2588(11)       |
| $\alpha/^\circ$                       | 90                |
| $\beta/^\circ$                        | 104.099(3)        |
| $\gamma/^\circ$                       | 90                |
| Volume/Å <sup>3</sup>                 | 7480.5(4)         |
| $Z$                                   | 16                |
| $\rho_{\text{calc}}/\text{g cm}^{-3}$ | 1.365             |
| $\mu/\text{mm}^{-1}$                  | 0.080             |



|                                             |                                                                |
|---------------------------------------------|----------------------------------------------------------------|
| F(000)                                      | 3232.0                                                         |
| Crystal size/mm <sup>3</sup>                | 0.2 × 0.2 × 0.15                                               |
| Radiation                                   | MoK $\alpha$ ( $\lambda$ = 0.71073)                            |
| 2 $\Theta$ range for data collection/°      | 6.468 to 55                                                    |
| Index ranges                                | -78 ≤ h ≤ 78, -5 ≤ k ≤ 5, -41 ≤ l ≤ 41                         |
| Reflections collected                       | 33586                                                          |
| Independent reflections                     | 8540 [ $R_{\text{int}}$ = 0.0468, $R_{\text{sigma}}$ = 0.0438] |
| Data/restraints/parameters                  | 8540/0/541                                                     |
| Goodness-of-fit on $F^2$                    | 1.177                                                          |
| Final R indexes [ $I \geq 2\sigma(I)$ ]     | $R_1$ = 0.0758, $wR_2$ = 0.1622                                |
| Final R indexes [all data]                  | $R_1$ = 0.0902, $wR_2$ = 0.1683                                |
| Largest diff. peak/hole / e Å <sup>-3</sup> | 0.30/-0.34                                                     |

**Table S2.** Fractional atomic coordinates ( $\times 10^4$ ) and equivalent isotropic displacement parameters ( $\text{\AA}^2 \times 10^3$ ) for 9,9'-divinyl-9*H*,9'*H*-3,3'-bicarbazole (**2m**).  $U_{\text{eq}}$  is defined as 1/3 of the trace of the orthogonalised  $U_{ij}$  tensor.

| Atom | <i>x</i>  | <i>y</i> | <i>z</i>  | $U(\text{eq})$ |
|------|-----------|----------|-----------|----------------|
| N1   | 5528.5(4) | 4972(6)  | 6675.1(7) | 16.6(5)        |
| N2   | 6690.8(4) | 1796(6)  | 5006.3(7) | 15.7(5)        |
| N3   | 8111.0(4) | 9397(6)  | 6976.0(7) | 16.1(5)        |
| N4   | 5503.7(4) | 10476(6) | 3682.0(7) | 17.0(5)        |
| C5   | 5664.2(4) | 8318(7)  | 4347.4(8) | 16.3(5)        |
| C6   | 7113.1(4) | 2868(7)  | 5092.6(8) | 17.4(5)        |
| C7   | 7095.5(4) | 5593(7)  | 5892.0(8) | 16.6(5)        |
| C8   | 5489.2(4) | 7282(7)  | 5390.0(8) | 16.7(5)        |
| C9   | 5282.7(4) | 10597(7) | 4253.1(8) | 17.2(5)        |
| C10  | 7553.9(4) | 6013(7)  | 6511.2(8) | 16.1(5)        |
| C11  | 5842.5(4) | 7601(7)  | 6547.0(8) | 16.3(5)        |
| C12  | 7845.9(4) | 6637(7)  | 7245.0(8) | 16.9(5)        |
| C13  | 5293.9(4) | 9686(7)  | 4671.7(8) | 18.6(6)        |
| C14  | 6909.0(4) | 2899(7)  | 5218.4(8) | 15.2(5)        |
| C15  | 6899.6(4) | 4359(7)  | 5612.8(8) | 15.2(5)        |
| C16  | 6550.1(5) | 5295(7)  | 5941.5(8) | 18.4(5)        |
| C17  | 7923.4(4) | 8736(7)  | 6629.8(8) | 15.3(5)        |
| C18  | 6201.4(5) | 3046(7)  | 5497.7(9) | 20.2(6)        |
| C19  | 7516.0(4) | 6631(7)  | 6074.4(8) | 16.4(5)        |
| C20  | 6042.1(5) | 7567(8)  | 3421.5(8) | 20.5(6)        |
| C21  | 5472.4(4) | 9900(7)  | 4093.9(8) | 15.9(5)        |
| C22  | 7756.6(4) | 7033(7)  | 6789.2(8) | 15.6(5)        |
| C23  | 7304.5(4) | 4175(7)  | 5370.1(8) | 18.4(6)        |
| C24  | 5678.7(4) | 7122(7)  | 6141.1(8) | 15.1(5)        |
| C25  | 6145.4(5) | 6199(7)  | 3819.7(9) | 20.1(6)        |
| C26  | 5673.5(4) | 7483(7)  | 4772.8(8) | 16.9(5)        |

|     |           |          |            |         |
|-----|-----------|----------|------------|---------|
| C27 | 6664.3(4) | 4210(7)  | 5637.9(8)  | 15.3(5) |
| C28 | 6318.9(5) | 4693(7)  | 5867.4(9)  | 21.1(6) |
| C29 | 7889.1(4) | 9371(7)  | 6195.6(8)  | 17.2(5) |
| C30 | 6058.5(5) | 9045(7)  | 6660.0(8)  | 18.7(6) |
| C31 | 7758.6(5) | 5219(7)  | 7567.4(9)  | 19.5(6) |
| C32 | 6034.8(4) | 6319(7)  | 4151.7(8)  | 17.1(5) |
| C33 | 5298.5(4) | 5786(7)  | 5491.8(8)  | 17.9(5) |
| C34 | 6542.7(4) | 2597(7)  | 5263.3(8)  | 15.4(5) |
| C35 | 6311.2(5) | 1956(7)  | 5189.4(9)  | 19.1(6) |
| C36 | 5717.7(4) | 9142(7)  | 3670.1(8)  | 16.3(5) |
| C37 | 5485.8(4) | 8167(7)  | 4939.1(8)  | 17.4(5) |
| C38 | 5294.1(4) | 4865(7)  | 5903.8(8)  | 17.3(5) |
| C39 | 6618.0(5) | 258(7)   | 4606.1(8)  | 18.2(6) |
| C40 | 8063.5(4) | 8104(7)  | 7347.4(8)  | 16.6(5) |
| C41 | 5746.0(4) | 6251(7)  | 6864.1(8)  | 17.3(5) |
| C42 | 5820.9(4) | 7796(7)  | 4076.8(8)  | 16.1(5) |
| C43 | 7302.4(4) | 5478(7)  | 5774.9(8)  | 16.4(5) |
| C44 | 5486.6(4) | 5526(7)  | 6231.9(8)  | 15.6(5) |
| C45 | 7687.0(4) | 8293(7)  | 5925.5(8)  | 17.7(5) |
| C46 | 5679.5(4) | 7929(7)  | 5721.6(8)  | 17.1(5) |
| C47 | 5861.0(5) | 6269(7)  | 7294.6(8)  | 19.8(6) |
| C48 | 8196.1(5) | 8183(7)  | 7767.9(8)  | 20.1(6) |
| C49 | 5828.5(5) | 9055(7)  | 3338.9(8)  | 19.7(6) |
| C50 | 6741.5(5) | -1328(8) | 4385.3(9)  | 23.5(6) |
| C51 | 7888.2(5) | 5313(8)  | 7985.3(9)  | 22.9(6) |
| C52 | 8104.4(5) | 6761(7)  | 8080.8(9)  | 22.9(6) |
| C53 | 6076.1(5) | 7670(8)  | 7399.6(9)  | 23.3(6) |
| C54 | 5347.9(5) | 12225(8) | 3368.0(9)  | 22.0(6) |
| C55 | 6175.1(5) | 9057(8)  | 7089.2(9)  | 21.6(6) |
| C56 | 5324.5(5) | 12173(9) | 2947.6(9)  | 29.1(7) |
| C57 | 8323.9(5) | 10751(8) | 6967.3(9)  | 22.1(6) |
| C58 | 8376.8(5) | 12606(8) | 6666.9(9)  | 24.4(6) |
| C59 | 5386.3(5) | 3655(8)  | 6913.6(9)  | 24.3(6) |
| C60 | 5198.5(5) | 1928(9)  | 6790.4(10) | 29.6(7) |

**Table S3.** Anisotropic displacement parameters ( $\text{\AA}^2 \times 10^3$ ) for 9,9'-divinyl-9*H*,9'*H*-3,3'-bicarbazole (**2m**). The anisotropic displacement factor exponent takes the form: -  $2\pi^2[h^2a^{*2}U_{11}+2hka^*b^*U_{12}+\dots]$ .

| Atom | U <sub>11</sub> | U <sub>22</sub> | U <sub>33</sub> | U <sub>23</sub> | U <sub>13</sub> | U <sub>12</sub> |
|------|-----------------|-----------------|-----------------|-----------------|-----------------|-----------------|
| N1   | 17.3(11)        | 17.7(11)        | 16.1(10)        | -0.7(9)         | 6.5(8)          | 2.5(9)          |
| N2   | 14.6(10)        | 16.7(11)        | 15.7(10)        | -0.4(9)         | 3.2(8)          | -1.2(9)         |
| N3   | 10.2(10)        | 18.0(11)        | 19.7(11)        | -1.7(9)         | 2.7(8)          | 0.0(9)          |
| N4   | 15.4(11)        | 20.2(12)        | 15(1)           | 0.2(9)          | 3.0(8)          | -1.9(9)         |

|     |          |          |          |          |          |          |
|-----|----------|----------|----------|----------|----------|----------|
| C5  | 15.4(12) | 15.1(13) | 18.4(12) | -2.5(10) | 3.8(10)  | -1.6(11) |
| C6  | 17.3(13) | 21.3(14) | 14.0(12) | -1.6(11) | 4.8(10)  | 2.0(11)  |
| C7  | 14.6(12) | 17.3(13) | 17.5(12) | -1(1)    | 3.1(10)  | 2.2(11)  |
| C8  | 15.9(12) | 16.6(13) | 18.6(12) | -1.8(10) | 6.2(10)  | 2.2(11)  |
| C9  | 14.4(12) | 17.4(13) | 18.5(12) | -1.3(11) | 1.6(10)  | 1.1(11)  |
| C10 | 12.1(12) | 16.4(13) | 20.4(12) | -1.8(11) | 5.3(10)  | 1.4(10)  |
| C11 | 18.0(13) | 14.4(13) | 17.5(12) | -1.5(10) | 5.9(10)  | 2.3(11)  |
| C12 | 15.2(12) | 15.1(13) | 19.3(12) | -2.4(10) | 2.3(10)  | 4.3(10)  |
| C13 | 15.0(13) | 20.6(14) | 21.6(13) | -3.9(11) | 7.1(10)  | -0.2(11) |
| C14 | 14.6(12) | 13.1(12) | 16.4(12) | 2.7(10)  | 0.7(10)  | 1(1)     |
| C15 | 16.3(12) | 13.8(12) | 15.2(12) | 2.4(10)  | 3.5(10)  | 2.9(10)  |
| C16 | 22.3(14) | 14.4(13) | 18.9(12) | 2.3(10)  | 6.2(10)  | 2.0(11)  |
| C17 | 10.8(11) | 15.4(13) | 19.1(12) | -4.1(10) | 2.5(9)   | 2.6(10)  |
| C18 | 12.6(12) | 19.8(14) | 29.0(14) | 6.6(12)  | 6.4(11)  | 0.2(11)  |
| C19 | 11.8(12) | 16.7(13) | 20.4(13) | -2.3(11) | 3(1)     | 1.9(10)  |
| C20 | 21.1(14) | 23.8(15) | 18.7(13) | -3.9(11) | 9.1(11)  | -7.4(12) |
| C21 | 16.9(13) | 16.3(13) | 14.2(12) | -0.9(10) | 2.8(10)  | -2.5(11) |
| C22 | 14.5(12) | 14.0(12) | 18.8(12) | -1.5(10) | 4.8(10)  | 2.5(10)  |
| C23 | 12.5(12) | 23.0(14) | 20.1(13) | 1.1(11)  | 4.4(10)  | 2.5(11)  |
| C24 | 11.5(11) | 14.4(12) | 20.0(12) | -3.5(10) | 5(1)     | 0.2(10)  |
| C25 | 15.8(13) | 21.5(14) | 23.9(13) | -5.3(11) | 6.8(11)  | -4.2(11) |
| C26 | 15.0(12) | 18.0(13) | 16.9(12) | -1.0(11) | 2.6(10)  | -1.0(11) |
| C27 | 15.8(12) | 12.9(12) | 17.2(12) | 4.2(10)  | 4.1(10)  | 0.6(10)  |
| C28 | 21.5(14) | 20.8(14) | 24.3(14) | 5.5(12)  | 11.6(11) | 5.8(12)  |
| C29 | 15.7(12) | 17.0(13) | 20.7(13) | -1.5(11) | 7.8(10)  | 0.0(11)  |
| C30 | 19.6(13) | 18.4(14) | 20.2(13) | -1.8(11) | 8.7(10)  | 1.7(11)  |
| C31 | 18.0(13) | 16.2(13) | 24.2(13) | 1.7(11)  | 4.7(11)  | 0.6(11)  |
| C32 | 16.3(12) | 17.3(13) | 17.3(12) | -2.4(10) | 3.1(10)  | -2.1(11) |
| C33 | 12.5(12) | 20.0(14) | 20.0(12) | -3.6(11) | 1.6(10)  | 0.2(11)  |
| C34 | 18.5(13) | 12.4(12) | 14.9(12) | 3.2(10)  | 3.4(10)  | 2(1)     |
| C35 | 18.5(13) | 16.4(13) | 20.9(13) | 3.3(11)  | 2(1)     | 0.2(11)  |
| C36 | 14.7(12) | 14.7(13) | 19.5(12) | -3.2(10) | 4.3(10)  | -4.6(10) |
| C37 | 17.0(13) | 17.4(13) | 17.8(12) | -2.7(11) | 4.2(10)  | -2.1(11) |
| C38 | 13.2(12) | 16.7(13) | 23.4(13) | -0.7(11) | 7.4(10)  | -1.3(10) |
| C39 | 16.1(13) | 19.5(14) | 17.2(12) | 0.1(11)  | 0.2(10)  | -3.7(11) |
| C40 | 15.0(12) | 13.9(12) | 20.6(13) | -1.9(10) | 3.7(10)  | 3.5(10)  |
| C41 | 18.8(13) | 14.4(13) | 20.0(13) | -1.5(10) | 7.5(10)  | 4.7(11)  |
| C42 | 17.0(12) | 15.4(13) | 16.6(12) | -2.9(10) | 5.6(10)  | -5.1(11) |
| C43 | 14.8(12) | 16.2(13) | 16.5(12) | -0.5(10) | 0.8(10)  | 1.6(11)  |
| C44 | 15.4(12) | 15.6(13) | 17.9(12) | -0.3(10) | 8.2(10)  | 3.1(11)  |
| C45 | 18.5(13) | 20.1(14) | 14.6(12) | 0.3(10)  | 4.2(10)  | 2.6(11)  |
| C46 | 14.6(12) | 18.1(13) | 20.1(12) | -2.8(11) | 7(1)     | -0.6(11) |
| C47 | 21.7(14) | 21.7(14) | 16.9(12) | 1.7(11)  | 6.3(10)  | 3.6(12)  |

|     |          |          |          |          |          |          |
|-----|----------|----------|----------|----------|----------|----------|
| C48 | 19.8(13) | 16.2(13) | 21.7(13) | -3.7(11) | -0.1(11) | 1.5(11)  |
| C49 | 21.9(14) | 21.1(14) | 16.3(12) | -3.0(11) | 4.7(10)  | -6.2(12) |
| C50 | 21.9(14) | 26.7(16) | 20.4(13) | -6.0(12) | 2.2(11)  | -3.2(13) |
| C51 | 29.0(15) | 18.4(14) | 21.2(13) | 2.0(11)  | 5.9(11)  | -0.4(12) |
| C52 | 27.7(15) | 19.7(14) | 17.6(13) | -1.4(11) | -1.5(11) | 2.1(12)  |
| C53 | 25.1(15) | 23.8(15) | 18.7(13) | -4.1(12) | 0.8(11)  | 3.1(12)  |
| C54 | 18.5(13) | 22.3(15) | 23.5(14) | 3.9(12)  | 1.9(11)  | -2.8(12) |
| C55 | 16.8(13) | 22.1(14) | 25.5(14) | -4.4(12) | 4.1(11)  | -1.4(12) |
| C56 | 23.6(15) | 38.9(19) | 22.1(14) | 6.3(13)  | 0.5(12)  | -0.4(14) |
| C57 | 15.4(13) | 25.7(15) | 23.7(14) | -3.4(12) | 2.1(11)  | -2.6(12) |
| C58 | 18.6(14) | 27.1(16) | 25.5(14) | -2.1(12) | 1.8(11)  | -6.1(12) |
| C59 | 23.5(14) | 30.6(16) | 20.6(13) | 3.7(12)  | 9.2(11)  | -0.4(13) |
| C60 | 28.7(16) | 37.3(18) | 24.6(15) | 5.4(14)  | 9.9(12)  | -7.5(14) |

**Table S4.** Bond lengths for 9,9'-divinyl-9*H*,9'*H*-3,3'-bicarbazole (**2m**).

| Atom | Atom | Length/Å | Atom | Atom | Length/Å |
|------|------|----------|------|------|----------|
| N1   | C41  | 1.406(3) | C16  | C27  | 1.397(4) |
| N1   | C44  | 1.407(3) | C16  | C28  | 1.385(4) |
| N1   | C59  | 1.389(3) | C17  | C22  | 1.411(4) |
| N2   | C14  | 1.403(3) | C17  | C29  | 1.388(4) |
| N2   | C34  | 1.399(3) | C18  | C28  | 1.392(4) |
| N2   | C39  | 1.397(3) | C18  | C35  | 1.393(4) |
| N3   | C17  | 1.411(3) | C19  | C43  | 1.486(3) |
| N3   | C40  | 1.395(3) | C19  | C45  | 1.407(4) |
| N3   | C57  | 1.404(3) | C20  | C25  | 1.393(4) |
| N4   | C21  | 1.406(3) | C20  | C49  | 1.388(4) |
| N4   | C36  | 1.409(3) | C23  | C43  | 1.406(4) |
| N4   | C54  | 1.389(3) | C24  | C44  | 1.416(4) |
| C5   | C21  | 1.396(4) | C24  | C46  | 1.391(4) |
| C5   | C26  | 1.399(4) | C25  | C32  | 1.396(4) |
| C5   | C42  | 1.453(4) | C26  | C37  | 1.398(4) |
| C6   | C14  | 1.394(4) | C27  | C34  | 1.405(4) |
| C6   | C23  | 1.382(4) | C29  | C45  | 1.386(4) |
| C7   | C15  | 1.393(4) | C30  | C55  | 1.393(4) |
| C7   | C43  | 1.397(4) | C31  | C51  | 1.386(4) |
| C8   | C33  | 1.407(4) | C32  | C42  | 1.389(4) |
| C8   | C37  | 1.491(4) | C33  | C38  | 1.384(4) |
| C8   | C46  | 1.393(4) | C34  | C35  | 1.390(4) |
| C9   | C13  | 1.383(4) | C36  | C42  | 1.412(4) |
| C9   | C21  | 1.397(4) | C36  | C49  | 1.394(4) |
| C10  | C19  | 1.393(4) | C38  | C44  | 1.396(4) |
| C10  | C22  | 1.393(4) | C39  | C50  | 1.312(4) |
| C11  | C24  | 1.450(4) | C40  | C48  | 1.399(4) |

|     |     |          |     |     |          |
|-----|-----|----------|-----|-----|----------|
| C11 | C30 | 1.393(4) | C41 | C47 | 1.394(4) |
| C11 | C41 | 1.401(4) | C47 | C53 | 1.381(4) |
| C12 | C22 | 1.446(4) | C48 | C52 | 1.384(4) |
| C12 | C31 | 1.394(4) | C51 | C52 | 1.395(4) |
| C12 | C40 | 1.405(4) | C53 | C55 | 1.398(4) |
| C13 | C37 | 1.403(4) | C54 | C56 | 1.329(4) |
| C14 | C15 | 1.410(4) | C57 | C58 | 1.315(4) |
| C15 | C27 | 1.450(4) | C59 | C60 | 1.303(4) |

**Table S5.** Bond angles for 9,9'-divinyl-9*H*,9'*H*-3,3'-bicarbazole (**2m**).

| Atom | Atom | Atom | Angle/°  | Atom | Atom | Atom | Angle/°  |
|------|------|------|----------|------|------|------|----------|
| C41  | N1   | C44  | 107.6(2) | C46  | C24  | C11  | 133.2(2) |
| C59  | N1   | C41  | 122.6(2) | C46  | C24  | C44  | 120.0(2) |
| C59  | N1   | C44  | 129.7(2) | C20  | C25  | C32  | 120.1(3) |
| C34  | N2   | C14  | 107.9(2) | C37  | C26  | C5   | 119.3(2) |
| C39  | N2   | C14  | 129.3(2) | C16  | C27  | C15  | 133.6(2) |
| C39  | N2   | C34  | 122.8(2) | C16  | C27  | C34  | 119.7(2) |
| C40  | N3   | C17  | 108.5(2) | C34  | C27  | C15  | 106.7(2) |
| C40  | N3   | C57  | 122.6(2) | C16  | C28  | C18  | 120.9(3) |
| C57  | N3   | C17  | 128.5(2) | C45  | C29  | C17  | 118.1(2) |
| C21  | N4   | C36  | 107.6(2) | C55  | C30  | C11  | 118.6(3) |
| C54  | N4   | C21  | 123.0(2) | C51  | C31  | C12  | 119.1(3) |
| C54  | N4   | C36  | 129.3(2) | C42  | C32  | C25  | 119.0(2) |
| C21  | C5   | C26  | 120.6(2) | C38  | C33  | C8   | 122.9(2) |
| C21  | C5   | C42  | 106.6(2) | N2   | C34  | C27  | 109.5(2) |
| C26  | C5   | C42  | 132.8(2) | C35  | C34  | N2   | 128.7(2) |
| C23  | C6   | C14  | 118.3(2) | C35  | C34  | C27  | 121.8(2) |
| C15  | C7   | C43  | 119.7(2) | C34  | C35  | C18  | 117.4(3) |
| C33  | C8   | C37  | 120.6(2) | N4   | C36  | C42  | 108.5(2) |
| C46  | C8   | C33  | 118.2(2) | C49  | C36  | N4   | 130.5(2) |
| C46  | C8   | C37  | 121.2(2) | C49  | C36  | C42  | 121.0(2) |
| C13  | C9   | C21  | 117.3(2) | C13  | C37  | C8   | 120.8(2) |
| C19  | C10  | C22  | 120.2(2) | C26  | C37  | C8   | 120.7(2) |
| C30  | C11  | C24  | 133.1(2) | C26  | C37  | C13  | 118.5(2) |
| C30  | C11  | C41  | 119.8(2) | C33  | C38  | C44  | 118.1(2) |
| C41  | C11  | C24  | 107.1(2) | C50  | C39  | N2   | 127.9(3) |
| C31  | C12  | C22  | 133.3(3) | N3   | C40  | C12  | 109.1(2) |
| C31  | C12  | C40  | 119.7(2) | N3   | C40  | C48  | 129.4(3) |
| C40  | C12  | C22  | 107.0(2) | C48  | C40  | C12  | 121.5(3) |
| C9   | C13  | C37  | 123.2(2) | C11  | C41  | N1   | 109.5(2) |
| N2   | C14  | C15  | 109.0(2) | C47  | C41  | N1   | 128.6(2) |
| C6   | C14  | N2   | 130.9(2) | C47  | C41  | C11  | 121.9(3) |
| C6   | C14  | C15  | 120.0(2) | C32  | C42  | C5   | 132.5(2) |

|     |     |     |          |     |     |     |          |
|-----|-----|-----|----------|-----|-----|-----|----------|
| C7  | C15 | C14 | 120.7(2) | C32 | C42 | C36 | 120.2(2) |
| C7  | C15 | C27 | 132.4(2) | C36 | C42 | C5  | 107.3(2) |
| C14 | C15 | C27 | 106.9(2) | C7  | C43 | C19 | 120.9(2) |
| C28 | C16 | C27 | 118.7(3) | C7  | C43 | C23 | 118.3(2) |
| N3  | C17 | C22 | 108.1(2) | C23 | C43 | C19 | 120.8(2) |
| C29 | C17 | N3  | 131.2(2) | N1  | C44 | C24 | 109.0(2) |
| C29 | C17 | C22 | 120.6(2) | C38 | C44 | N1  | 130.7(2) |
| C28 | C18 | C35 | 121.4(3) | C38 | C44 | C24 | 120.3(2) |
| C10 | C19 | C43 | 120.5(2) | C29 | C45 | C19 | 122.7(2) |
| C10 | C19 | C45 | 118.2(2) | C24 | C46 | C8  | 120.4(2) |
| C45 | C19 | C43 | 121.3(2) | C53 | C47 | C41 | 117.4(3) |
| C49 | C20 | C25 | 122.0(2) | C52 | C48 | C40 | 117.4(3) |
| C5  | C21 | N4  | 109.9(2) | C20 | C49 | C36 | 117.7(3) |
| C5  | C21 | C9  | 121.1(2) | C31 | C51 | C52 | 120.4(3) |
| C9  | C21 | N4  | 129.0(2) | C48 | C52 | C51 | 121.9(3) |
| C10 | C22 | C12 | 132.6(2) | C47 | C53 | C55 | 121.7(3) |
| C10 | C22 | C17 | 120.1(2) | C56 | C54 | N4  | 128.4(3) |
| C17 | C22 | C12 | 107.3(2) | C30 | C55 | C53 | 120.5(3) |
| C6  | C23 | C43 | 122.8(2) | C58 | C57 | N3  | 128.1(3) |
| C44 | C24 | C11 | 106.8(2) | C60 | C59 | N1  | 129.9(3) |

**Table S6.** Hydrogen atom coordinates ( $\text{\AA}\times 10^4$ ) and isotropic displacement parameters ( $\text{\AA}^2\times 10^3$ ) for 9,9'-divinyl-9*H*,9'*H*-3,3'-bicarbazole (**2m**).

| Atom | <i>x</i> | <i>y</i> | <i>z</i> | U(eq) |
|------|----------|----------|----------|-------|
| H6   | 7120     | 1989     | 4829     | 21    |
| H7   | 7089     | 6489     | 6155     | 20    |
| H9   | 5154     | 11632    | 4084     | 21    |
| H10  | 7444     | 4914     | 6618     | 19    |
| H13  | 5168     | 10101    | 4781     | 22    |
| H16  | 6628     | 6401     | 6189     | 22    |
| H18  | 6046     | 2664     | 5456     | 24    |
| H20  | 6119     | 7481     | 3205     | 25    |
| H23  | 7440     | 4194     | 5286     | 22    |
| H25  | 6288     | 5203     | 3864     | 24    |
| H26  | 5803     | 6484     | 4943     | 20    |
| H28  | 6241     | 5399     | 6067     | 25    |
| H29  | 7999     | 10488    | 6089     | 21    |
| H30  | 6123     | 9982     | 6453     | 22    |
| H31  | 7615     | 4224     | 7503     | 23    |
| H32  | 6103     | 5425     | 4419     | 21    |
| H33  | 5170     | 5399     | 5273     | 21    |

|      |      |       |      |    |
|------|------|-------|------|----|
| H35  | 6233 | 843   | 4944 | 23 |
| H38  | 5167 | 3835  | 5960 | 21 |
| H39  | 6463 | 372   | 4481 | 22 |
| H45  | 7664 | 8686  | 5634 | 21 |
| H46  | 5808 | 8906  | 5662 | 21 |
| H47  | 5795 | 5372  | 7503 | 24 |
| H48  | 8340 | 9153  | 7835 | 24 |
| H49  | 5762 | 9963  | 3072 | 24 |
| H50A | 6898 | -1525 | 4494 | 28 |
| H50B | 6673 | -2256 | 4120 | 28 |
| H51  | 7831 | 4404  | 8203 | 27 |
| H52  | 8189 | 6772  | 8363 | 27 |
| H53  | 6157 | 7692  | 7684 | 28 |
| H54  | 5247 | 13613 | 3464 | 26 |
| H55  | 6320 | 9994  | 7170 | 26 |
| H56A | 5420 | 10834 | 2831 | 35 |
| H56B | 5212 | 13474 | 2770 | 35 |
| H57  | 8442 | 10276 | 7204 | 26 |
| H58A | 8266 | 13166 | 6423 | 29 |
| H58B | 8525 | 13358 | 6699 | 29 |
| H59  | 5432 | 4069  | 7206 | 29 |
| H60A | 5142 | 1416  | 6503 | 36 |
| H60B | 5121 | 1209  | 6990 | 36 |

## Experimental

The crystal was kept at 100.01(10) K during data collection. Using Olex2 [1], the structure was solved with the Superflip [2] structure solution program using Charge Flipping and refined with the ShelXL [3] refinement package using Least Squares minimisation.

1. Dolomanov, O.V., Bourhis, L.J., Gildea, R.J., Howard, J.A.K. & Puschmann, H. (2009), J. Appl. Cryst. 42, 339-341.
2. Palatinus, L. & Chapuis, G. (2007). J. Appl. Cryst., 40, 786-790; Palatinus, L. & van der Lee, A. (2008). J. Appl. Cryst. 41, 975-984; Palatinus, L., Prathapa, S. J. & van Smaalen, S. (2012). J. Appl. Cryst. 45, 575-580.
3. Sheldrick, G.M. (2015). Acta Cryst. C71, 3-8.

### 5.3 X-ray crystallography data for 2-methyl-4-(4-methylpiperazin-1-yl)-10-vinyl-10H-benzo[b]thieno[2,3-e][1,4]diazepine (**2n**)

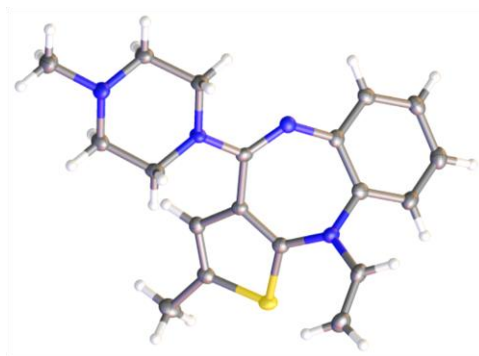

**Figure S33.** X-ray crystal structure of 2-methyl-4-(4-methylpiperazin-1-yl)-10-vinyl-10*H*-benzo[*b*]thieno[2,3-*e*][1,4]diazepine (**2n**) (CCDC 1585614).

Crystal data for  $C_{19}H_{22}N_4S$  ( $M = 338.46$  g/mol): monoclinic, space group  $P2_1/n$  (no. 14),  $a = 8.9450(4)$  Å,  $b = 14.1199(8)$  Å,  $c = 14.0081(6)$  Å,  $\beta = 98.512(4)^\circ$ ,  $V = 1749.77(15)$  Å<sup>3</sup>,  $Z = 4$ ,  $T = 100.00(10)$  K,  $\mu(\text{MoK}\alpha) = 0.193$  mm<sup>-1</sup>,  $D_{\text{calc}} = 1.285$  g/cm<sup>3</sup>, 8032 reflections measured ( $5.084^\circ \leq 2\Theta \leq 55^\circ$ ), 4001 unique ( $R_{\text{int}} = 0.0306$ ,  $R_{\text{sigma}} = 0.0594$ ) which were used in all calculations. The final  $R_1$  was 0.0488 ( $I > 2\sigma(I)$ ) and  $wR_2$  was 0.1070 (all data).

**Table S7.** Crystal data and structure refinement for 2-methyl-4-(4-methylpiperazin-1-yl)-10-vinyl-10*H*-benzo[*b*]thieno[2,3-*e*][1,4]diazepine (**2n**)

|                                               |                                                                   |
|-----------------------------------------------|-------------------------------------------------------------------|
| Empirical formula                             | $C_{19}H_{22}N_4S$                                                |
| Formula weight                                | 338.46                                                            |
| Temperature/K                                 | 100.00(10)                                                        |
| Crystal system                                | monoclinic                                                        |
| Space group                                   | $P2_1/n$                                                          |
| $a/\text{\AA}$                                | 8.9450(4)                                                         |
| $b/\text{\AA}$                                | 14.1199(8)                                                        |
| $c/\text{\AA}$                                | 14.0081(6)                                                        |
| $\alpha/^\circ$                               | 90                                                                |
| $\beta/^\circ$                                | 98.512(4)                                                         |
| $\gamma/^\circ$                               | 90                                                                |
| Volume/Å <sup>3</sup>                         | 1749.77(15)                                                       |
| $Z$                                           | 4                                                                 |
| $\rho_{\text{calc}}/\text{g/cm}^3$            | 1.285                                                             |
| $\mu/\text{mm}^{-1}$                          | 0.193                                                             |
| $F(000)$                                      | 720.0                                                             |
| Crystal size/mm <sup>3</sup>                  | $0.15 \times 0.15 \times 0.1$                                     |
| Radiation                                     | MoK $\alpha$ ( $\lambda = 0.71073$ )                              |
| $2\Theta$ range for data collection/ $^\circ$ | 5.084 to 55                                                       |
| Index ranges                                  | $-11 \leq h \leq 11$ , $-18 \leq k \leq 7$ , $-12 \leq l \leq 18$ |
| Reflections collected                         | 8032                                                              |
| Independent reflections                       | 4001 [ $R_{\text{int}} = 0.0306$ , $R_{\text{sigma}} = 0.0594$ ]  |
| Data/restraints/parameters                    | 4001/0/219                                                        |
| Goodness-of-fit on $F^2$                      | 1.027                                                             |
| Final $R$ indexes [ $I > 2\sigma(I)$ ]        | $R_1 = 0.0488$ , $wR_2 = 0.0948$                                  |



Final R indexes [all data]  $R_1 = 0.0786$ ,  $wR_2 = 0.1070$   
 Largest diff. peak/hole / e Å<sup>-3</sup> 0.40/-0.27

**Table S8.** Fractional atomic coordinates ( $\times 10^4$ ) and equivalent isotropic displacement parameters ( $\text{\AA}^2 \times 10^3$ ) for 2-methyl-4-(4-methylpiperazin-1-yl)-10-vinyl-10*H*-benzo[*b*]thieno[2,3-*e*][1,4]-diazepine (**2n**).  $U_{eq}$  is defined as 1/3 of of the trace of the orthogonalised  $U_{ij}$  tensor.

| Atom | <i>x</i>    | <i>y</i>    | <i>z</i>   | $U_{eq}$  |
|------|-------------|-------------|------------|-----------|
| S1   | 7240.3(6)   | 7893.1(4)   | 3143.2(3)  | 20.97(14) |
| N1   | 10227.3(17) | 8404.1(12)  | 6125.9(10) | 17.4(4)   |
| N2   | 8457.0(17)  | 9542.3(13)  | 6283.4(10) | 18.4(4)   |
| N3   | 7398.7(18)  | 11015.1(13) | 7408.0(11) | 21.2(4)   |
| C4   | 8038(2)     | 7857.5(15)  | 4353.0(12) | 17.5(4)   |
| N5   | 8619.9(18)  | 7030.1(12)  | 4822.4(11) | 20.1(4)   |
| C6   | 12545(2)    | 7708.0(15)  | 5810.3(13) | 19.7(4)   |
| C7   | 10963(2)    | 7734.7(14)  | 5626.9(12) | 17.4(4)   |
| C8   | 9169(2)     | 9706.5(15)  | 7278.6(13) | 21.9(5)   |
| C9   | 7793(2)     | 9463.5(15)  | 4042.5(12) | 18.8(4)   |
| C10  | 6404(2)     | 6038.0(17)  | 4404.3(14) | 26.7(5)   |
| C11  | 9026(2)     | 8856.3(14)  | 5745.9(12) | 16.5(4)   |
| C12  | 6513(2)     | 9654.8(17)  | 2285.1(13) | 26.1(5)   |
| C13  | 6870(2)     | 9833.1(16)  | 6129.6(13) | 21.3(5)   |
| C14  | 7825(2)     | 6183.1(15)  | 4788.6(14) | 22.4(4)   |
| C15  | 13370(2)    | 7046.1(16)  | 5384.1(13) | 22.9(5)   |
| C16  | 8269(2)     | 8737.5(14)  | 4736.7(12) | 15.9(4)   |
| C17  | 10236(2)    | 7030.5(15)  | 5012.9(13) | 18.6(4)   |
| C18  | 12629(2)    | 6370.9(16)  | 4764.5(14) | 24.9(5)   |
| C19  | 8984(2)     | 10730.3(16) | 7545.5(13) | 22.1(5)   |
| C1A  | 6755(2)     | 10866.5(16) | 6392.1(13) | 22.6(5)   |
| C1B  | 7204(2)     | 9121.2(15)  | 3162.2(13) | 19.9(4)   |
| C1C  | 11066(2)    | 6371.3(15)  | 4580.8(13) | 22.6(5)   |
| C1D  | 7264(3)     | 12010.6(17) | 7674.6(15) | 29.8(5)   |

**Table S9.** Anisotropic displacement parameters ( $\text{\AA}^2 \times 10^3$ ) for 2-methyl-4-(4-methylpiperazin-1-yl)-10-vinyl-10*H*-benzo[*b*]thieno[2,3-*e*][1,4]-diazepine (**2n**). The anisotropic displacement factor exponent takes the form:  $-2\pi^2[h^2a^{*2}U_{11}+2hka^*b^*U_{12}+\dots]$ .

| Atom | $U_{11}$ | $U_{22}$ | $U_{33}$ | $U_{23}$ | $U_{13}$ | $U_{12}$ |
|------|----------|----------|----------|----------|----------|----------|
| S1   | 21.7(3)  | 24.6(3)  | 15.9(2)  | -4.0(2)  | 0.21(17) | -0.8(2)  |
| N1   | 19.2(8)  | 17.3(10) | 16.0(7)  | 1.9(7)   | 3.2(6)   | -0.5(7)  |
| N2   | 18.6(8)  | 22.2(10) | 13.6(7)  | -2.9(7)  | -0.8(6)  | 2.7(7)   |
| N3   | 21.5(9)  | 23.7(10) | 18.3(8)  | -4.7(7)  | 2.5(6)   | 3.6(8)   |
| C4   | 16.4(9)  | 20.0(11) | 16.4(9)  | 0.1(8)   | 3.0(7)   | -0.9(9)  |
| N5   | 21.5(9)  | 16.3(10) | 21.3(8)  | -1.1(7)  | -0.6(6)  | -1.7(7)  |
| C6   | 21.8(10) | 20.0(12) | 16.8(9)  | 4.6(8)   | 1.9(7)   | 0.2(9)   |
| C7   | 21.9(10) | 16.7(11) | 14.1(8)  | 4.0(8)   | 4.0(7)   | 1.7(8)   |
| C8   | 24.1(10) | 24.6(12) | 15.4(9)  | -3.8(9)  | -2.4(7)  | 3.3(9)   |
| C9   | 18.6(10) | 18.2(11) | 19.9(9)  | 1.3(8)   | 3.7(7)   | 0.7(9)   |
| C10  | 26.0(11) | 20.5(12) | 34.5(11) | -3.1(10) | 6.9(9)   | -4.4(10) |

|     |          |          |          |         |        |          |
|-----|----------|----------|----------|---------|--------|----------|
| C11 | 17.5(10) | 15.1(10) | 16.5(9)  | 0.1(8)  | 1.6(7) | -4.5(8)  |
| C12 | 27.7(11) | 32.5(14) | 17.0(9)  | 5.6(9)  | 0.1(8) | -0.4(10) |
| C13 | 15.9(9)  | 29.8(13) | 17.8(9)  | -3.3(9) | 0.6(7) | -0.3(9)  |
| C14 | 27.3(11) | 15.2(11) | 25.3(10) | -0.7(9) | 6.2(8) | -0.6(9)  |
| C15 | 20.1(10) | 26.6(13) | 22.2(10) | 5.7(9)  | 3.5(8) | 4.4(9)   |
| C16 | 14.0(9)  | 18.8(11) | 15.1(9)  | -1.1(8) | 2.6(7) | -1.3(8)  |
| C17 | 21.5(10) | 16.4(11) | 17.7(9)  | 4.3(8)  | 2.3(7) | -1.5(9)  |
| C18 | 29.2(11) | 23.9(13) | 22.7(10) | 1.8(9)  | 7.9(8) | 7.5(10)  |
| C19 | 21.1(10) | 25.7(12) | 18.8(9)  | -4.8(9) | 0.4(7) | 0.4(9)   |
| C1A | 19.4(10) | 27.9(13) | 20.5(9)  | -2.5(9) | 2.7(7) | 4.1(9)   |
| C1B | 17.1(9)  | 24.4(12) | 18.2(9)  | 0.8(9)  | 3.1(7) | 0.3(9)   |
| C1C | 29.7(11) | 17.9(12) | 19.8(9)  | -1.4(9) | 2.3(8) | 1.3(9)   |
| C1D | 30.0(12) | 28.8(14) | 30.2(11) | -8(1)   | 3.5(9) | 5.1(11)  |

**Table S10.** Bond lengths for 2-methyl-4-(4-methylpiperazin-1-yl)-10-10*H*-benzo[*b*]thieno[2,3-*e*][1,4]-diazepine (**2n**).

| Atom | Atom | Length/Å   | Atom | Atom | Length/Å |
|------|------|------------|------|------|----------|
| S1   | C4   | 1.7396(18) | C6   | C7   | 1.401(3) |
| S1   | C1B  | 1.735(2)   | C6   | C15  | 1.380(3) |
| N1   | C7   | 1.397(2)   | C7   | C17  | 1.409(3) |
| N1   | C11  | 1.295(2)   | C8   | C19  | 1.508(3) |
| N2   | C8   | 1.463(2)   | C9   | C16  | 1.434(3) |
| N2   | C11  | 1.370(2)   | C9   | C1B  | 1.356(3) |
| N2   | C13  | 1.463(2)   | C10  | C14  | 1.321(3) |
| N3   | C19  | 1.459(2)   | C11  | C16  | 1.484(2) |
| N3   | C1A  | 1.469(2)   | C12  | C1B  | 1.495(3) |
| N3   | C1D  | 1.464(3)   | C13  | C1A  | 1.512(3) |
| C4   | N5   | 1.402(3)   | C15  | C18  | 1.390(3) |
| C4   | C16  | 1.357(3)   | C17  | C1C  | 1.385(3) |
| N5   | C14  | 1.389(3)   | C18  | C1C  | 1.383(3) |
| N5   | C17  | 1.430(2)   |      |      |          |

**Table S11.** Bond angles for 2-methyl-4-(4-methylpiperazin-1-yl)-10-vinyl-10*H*-benzo[*b*]thieno[2,3-*e*][1,4]-diazepine (**2n**).

| Atom | Atom | Atom | Angle/°    | Atom | Atom | Atom | Angle/°    |
|------|------|------|------------|------|------|------|------------|
| C1B  | S1   | C4   | 91.14(9)   | N1   | C11  | N2   | 118.42(16) |
| C11  | N1   | C7   | 123.49(16) | N1   | C11  | C16  | 124.76(17) |
| C8   | N2   | C13  | 111.83(14) | N2   | C11  | C16  | 116.66(17) |
| C11  | N2   | C8   | 119.40(16) | N2   | C13  | C1A  | 109.54(16) |
| C11  | N2   | C13  | 123.29(15) | C10  | C14  | N5   | 127.2(2)   |
| C19  | N3   | C1A  | 108.81(14) | C6   | C15  | C18  | 119.92(19) |
| C19  | N3   | C1D  | 110.26(16) | C4   | C16  | C9   | 111.93(16) |
| C1D  | N3   | C1A  | 110.42(16) | C4   | C16  | C11  | 120.12(17) |
| N5   | C4   | S1   | 123.45(15) | C9   | C16  | C11  | 127.83(18) |
| C16  | C4   | S1   | 112.06(15) | C7   | C17  | N5   | 118.47(18) |
| C16  | C4   | N5   | 123.57(16) | C1C  | C17  | N5   | 120.72(18) |
| C4   | N5   | C17  | 112.43(16) | C1C  | C17  | C7   | 120.78(18) |

|     |    |     |            |     |     |     |            |
|-----|----|-----|------------|-----|-----|-----|------------|
| C14 | N5 | C4  | 123.30(16) | C1C | C18 | C15 | 119.42(19) |
| C14 | N5 | C17 | 120.32(17) | N3  | C19 | C8  | 111.82(17) |
| C15 | C6 | C7  | 121.94(19) | N3  | C1A | C13 | 110.02(17) |
| N1  | C7 | C6  | 117.68(17) | C9  | C1B | S1  | 111.38(15) |
| N1  | C7 | C17 | 124.99(17) | C9  | C1B | C12 | 128.7(2)   |
| C6  | C7 | C17 | 117.10(18) | C12 | C1B | S1  | 119.85(15) |
| N2  | C8 | C19 | 109.86(16) | C18 | C1C | C17 | 120.78(19) |
| C1B | C9 | C16 | 113.47(19) |     |     |     |            |

**Table S12.** Hydrogen atom coordinates ( $\text{\AA} \times 10^4$ ) and isotropic displacement parameters ( $\text{\AA}^2 \times 10^3$ ) for 2-methyl-4-(4-methylpiperazin-1-yl)-10-vinyl-10*H*-benzo[*b*]thieno[2,3-*e*][1,4]-diazepine (**2n**).

| Atom | <i>x</i> | <i>y</i> | <i>z</i> | U(eq) |
|------|----------|----------|----------|-------|
| H6   | 13055    | 8149     | 6232     | 24    |
| H8A  | 10235    | 9550     | 7344     | 26    |
| H8B  | 8706     | 9302     | 7712     | 26    |
| H9   | 7879     | 10107    | 4182     | 23    |
| H10A | 5825     | 6537     | 4116     | 32    |
| H10B | 5983     | 5437     | 4422     | 32    |
| H12A | 6943     | 9439     | 1735     | 39    |
| H12B | 6710     | 10319    | 2380     | 39    |
| H12C | 5441     | 9549     | 2177     | 39    |
| H13A | 6302     | 9451     | 6526     | 26    |
| H13B | 6443     | 9738     | 5459     | 26    |
| H14  | 8351     | 5660     | 5067     | 27    |
| H15  | 14420    | 7052     | 5511     | 28    |
| H18  | 13179    | 5923     | 4476     | 30    |
| H19A | 9415     | 10825    | 8216     | 27    |
| H19B | 9533     | 11128    | 7152     | 27    |
| H1AA | 7296     | 11250    | 5981     | 27    |
| H1AB | 5703     | 11061    | 6289     | 27    |
| H1C  | 10568    | 5924     | 4162     | 27    |
| H1DA | 7695     | 12098    | 8338     | 45    |
| H1DB | 6216     | 12187    | 7588     | 45    |
| H1DC | 7792     | 12400    | 7272     | 45    |

## Experimental

The crystal was kept at 100.01(10) K during data collection. Using Olex2 [1], the structure was solved with the Superflip [2] structure solution program using Charge Flipping and refined with the ShelXL [3] refinement package using Least Squares minimisation.

1. Dolomanov, O.V., Bourhis, L.J., Gildea, R.J., Howard, J.A.K. & Puschmann, H. (2009), J. Appl. Cryst. 42, 339-341.

2. Palatinus, L. & Chapuis, G. (2007). *J. Appl. Cryst.*, 40, 786-790; Palatinus, L. & van der Lee, A. (2008). *J. Appl. Cryst.* 41, 975-984; Palatinus, L., Prathapa, S. J. & van Smaalen, S. (2012). *J. Appl. Cryst.* 45, 575-580.
3. Sheldrick, G.M. (2015). *Acta Cryst. C*71, 3-8.
